# Supplementary material
Source: PubMed Central journal article supplement (PMC8769922)

# Data S1: Raw data curves relating to ELISAs and neutralization in Figure 1 and 2

| Page | Title                                                                                                                                                |
|------|------------------------------------------------------------------------------------------------------------------------------------------------------|
| 2    | Raw SARS-CoV-2 HexaPro IgG ELISA curves and fits associated with Figure 1A                                                                           |
| 3    | Raw ELISA curves and fits associated with figure 1B-F                                                                                                |
| 4    | Normalized neutralization curves using VSV pseudovirus on VeroE6-TMPRSS2 cells for breakthrough cases 30 days post infection.                        |
| 5    | Normalized neutralization curves using VSV pseudovirus on VeroE6-TMPRSS2 cells for breakthrough cases 60 days post infection.                        |
| 6    | Normalized neutralization curves using VSV pseudovirus on VeroE6-TMPRSS2 cells for 2X infected/vaccinated subjects 10 days post second vaccination.  |
| 7    | Normalized neutralization curves using VSV pseudovirus on VeroE6-TMPRSS2 cells for 2X infected/vaccinated subjects 112 days post second vaccination. |
| 8    | Normalized neutralization curves using VSV pseudovirus on VeroE6-TMPRSS2 cells for 2X infected/vaccinated subjects 180 days post second vaccination. |
| 9    | Normalized neutralization curves using VSV pseudovirus on VeroE6-TMPRSS2 cells for 3X infected/vaccinated subjects ~10 days post third vaccination.  |
| 10   | Normalized neutralization curves using VSV pseudovirus on VeroE6-TMPRSS2 cells for 2X vaccinated-only subjects 10 days post second vaccination.      |
| 11   | Normalized neutralization curves using VSV pseudovirus on VeroE6-TMPRSS2 cells for 2X vaccinated-only subjects 112 days post second vaccination.     |
| 12   | Normalized neutralization curves using VSV pseudovirus on VeroE6-TMPRSS2 cells for 2X vaccinated-only subjects 180 days post second vaccination.     |
| 13   | Normalized neutralization curves using VSV pseudovirus on VeroE6-TMPRSS2 cells for 3X vaccinated-only subjects 10 days post third vaccination.       |
| 14   | Normalized neutralization curves using VSV pseudovirus on VeroE6-TMPRSS2 cells for HCP 30 days post vaccination.                                     |

# Raw SARS-CoV-2 HexaPro IgG ELISA curves and fits associated with Figure 1A, broken out by group.

SARS-CoV-2 HexaPro IgG Delta Breakthrough 30 days

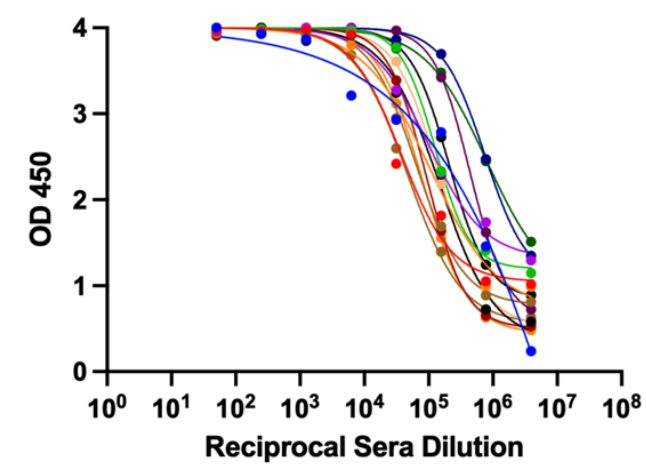

SARS-CoV-2 HexaPro IgG Delta Breakthrough 60 days

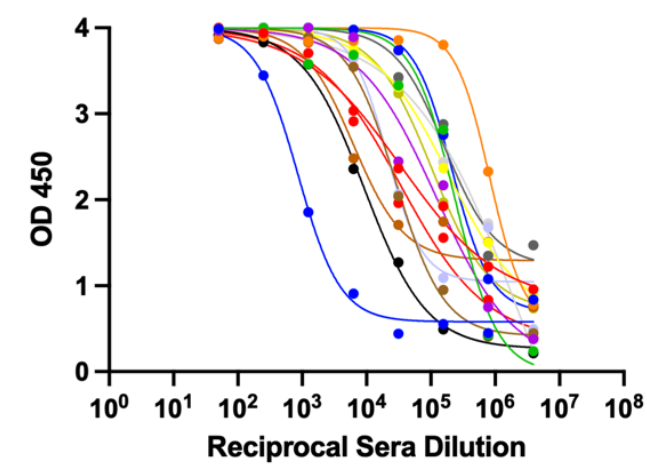

SARS-CoV-2 HexaPro IgG Delta Breakthrough 90 days

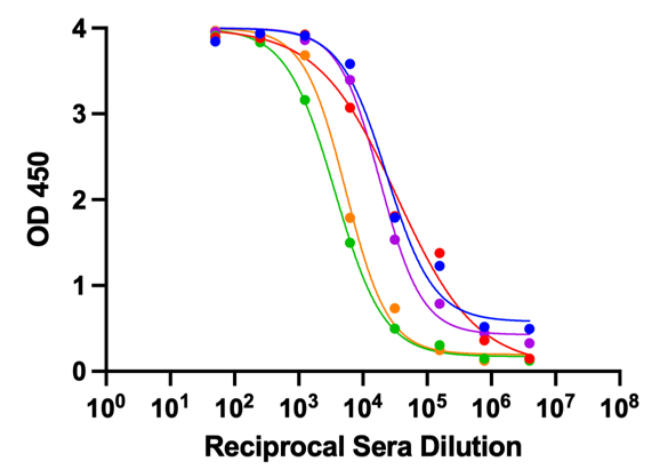

SARS-CoV-2 HexaPro IgG Infected/vaccinated 10 days

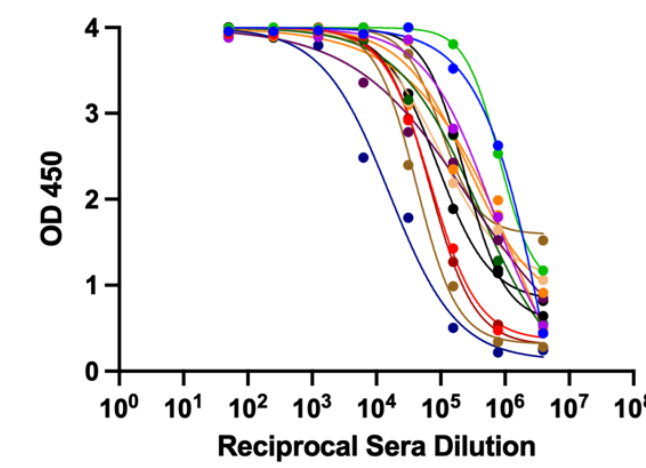

SARS-CoV-2 HexaPro IgG Infected/vaccinated 112 days

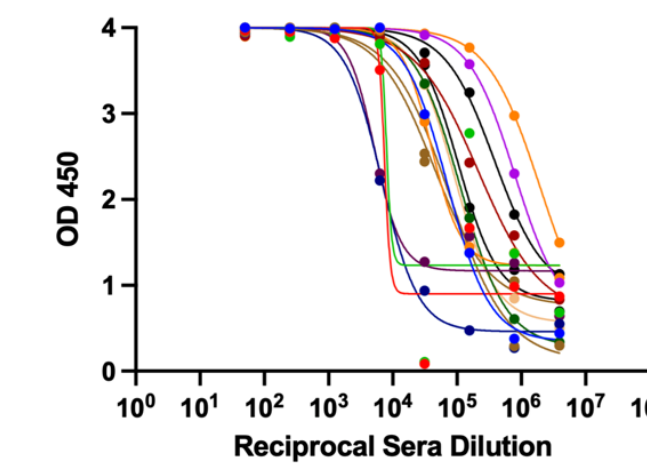

SARS-CoV-2 HexaPro IgG Infected/vaccinated 180 days

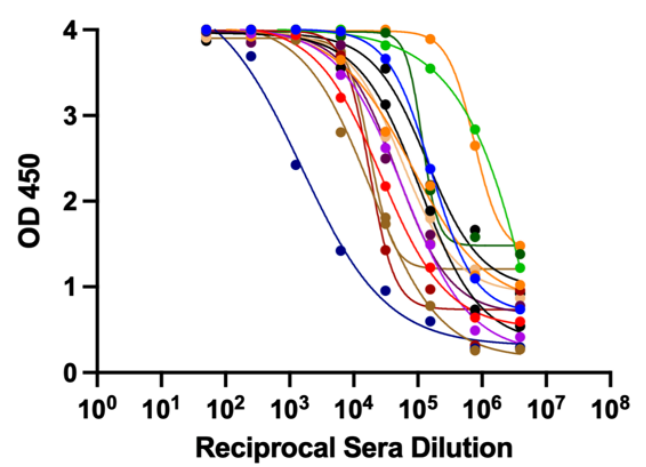

SARS-CoV-2 HexaPro IgG Infected/vaccinated 3X 10 days

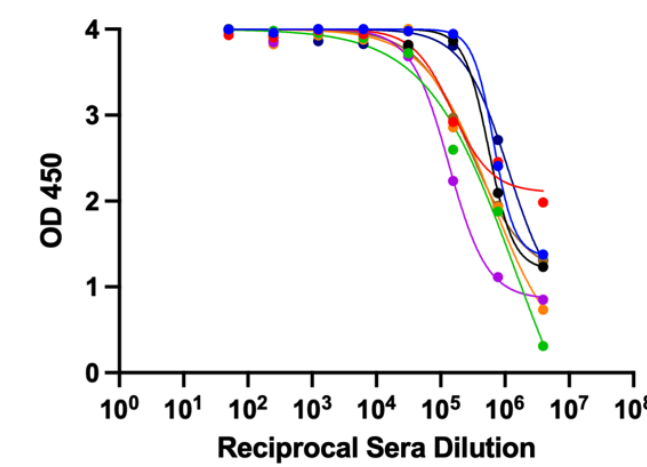

SARS-CoV-2 HexaPro IgG Vaccinated only 10 days

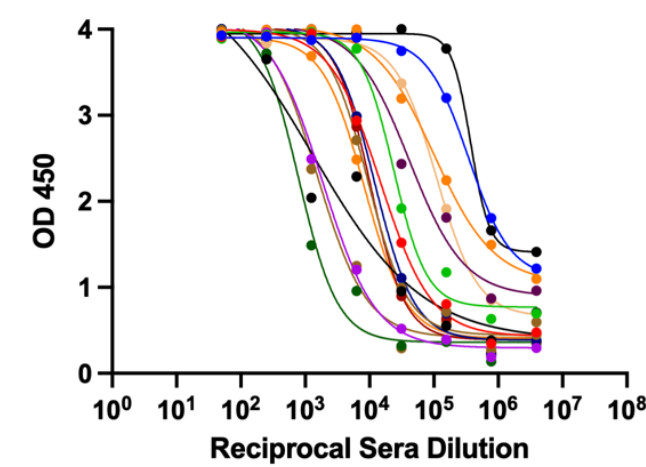

SARS-CoV-2 HexaPro IgG Vaccinated only 112 days

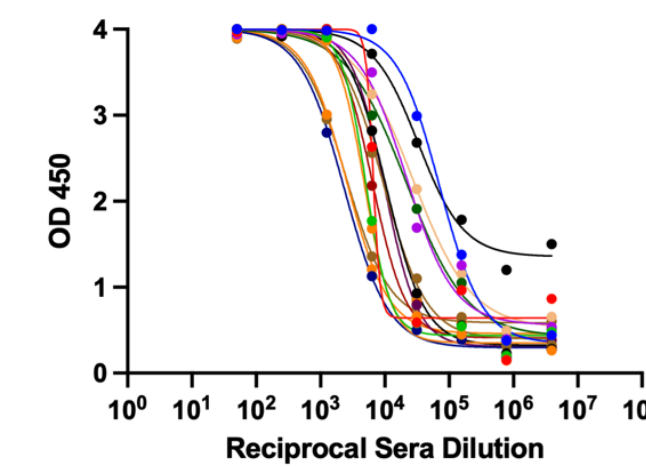

SARS-CoV-2 HexaPro IgG Vaccinated only 180 days

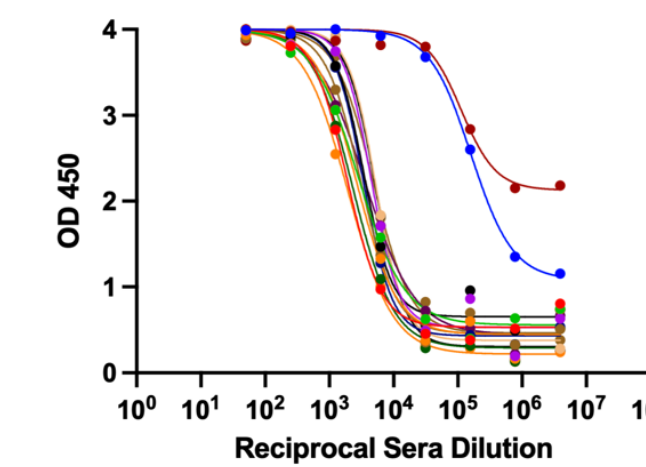

SARS-CoV-2 HexaPro IgG Vaccinated only 3X 10 days

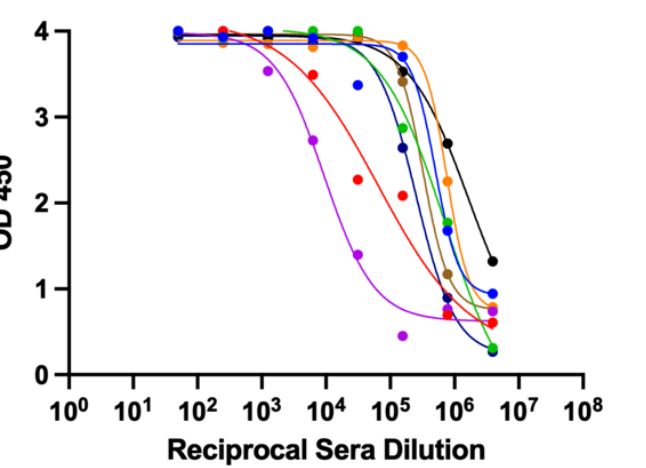

SARS-CoV-2 HexaPro IgG HCS 30 days

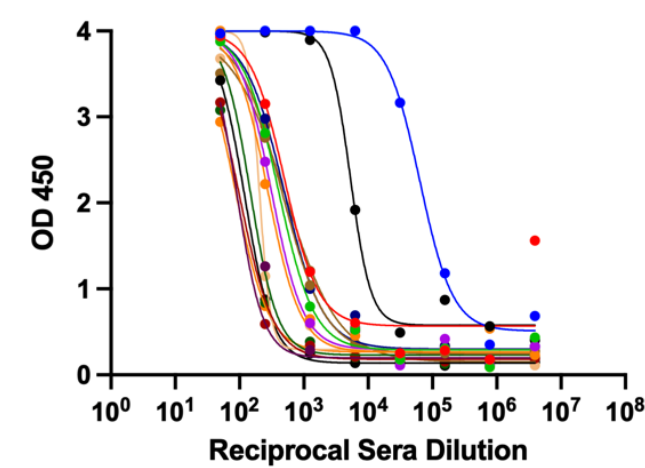

SARS-CoV-2 HexaPro IgG Naive

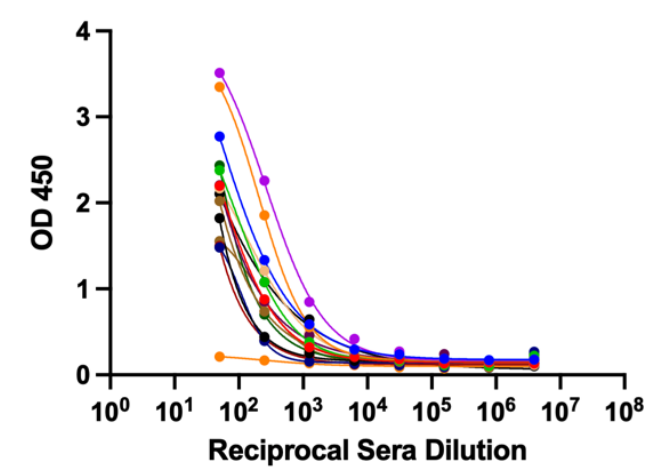

# Raw ELISA curves and fits associated with figure 1B-F, broken out by group, antigen and secondary

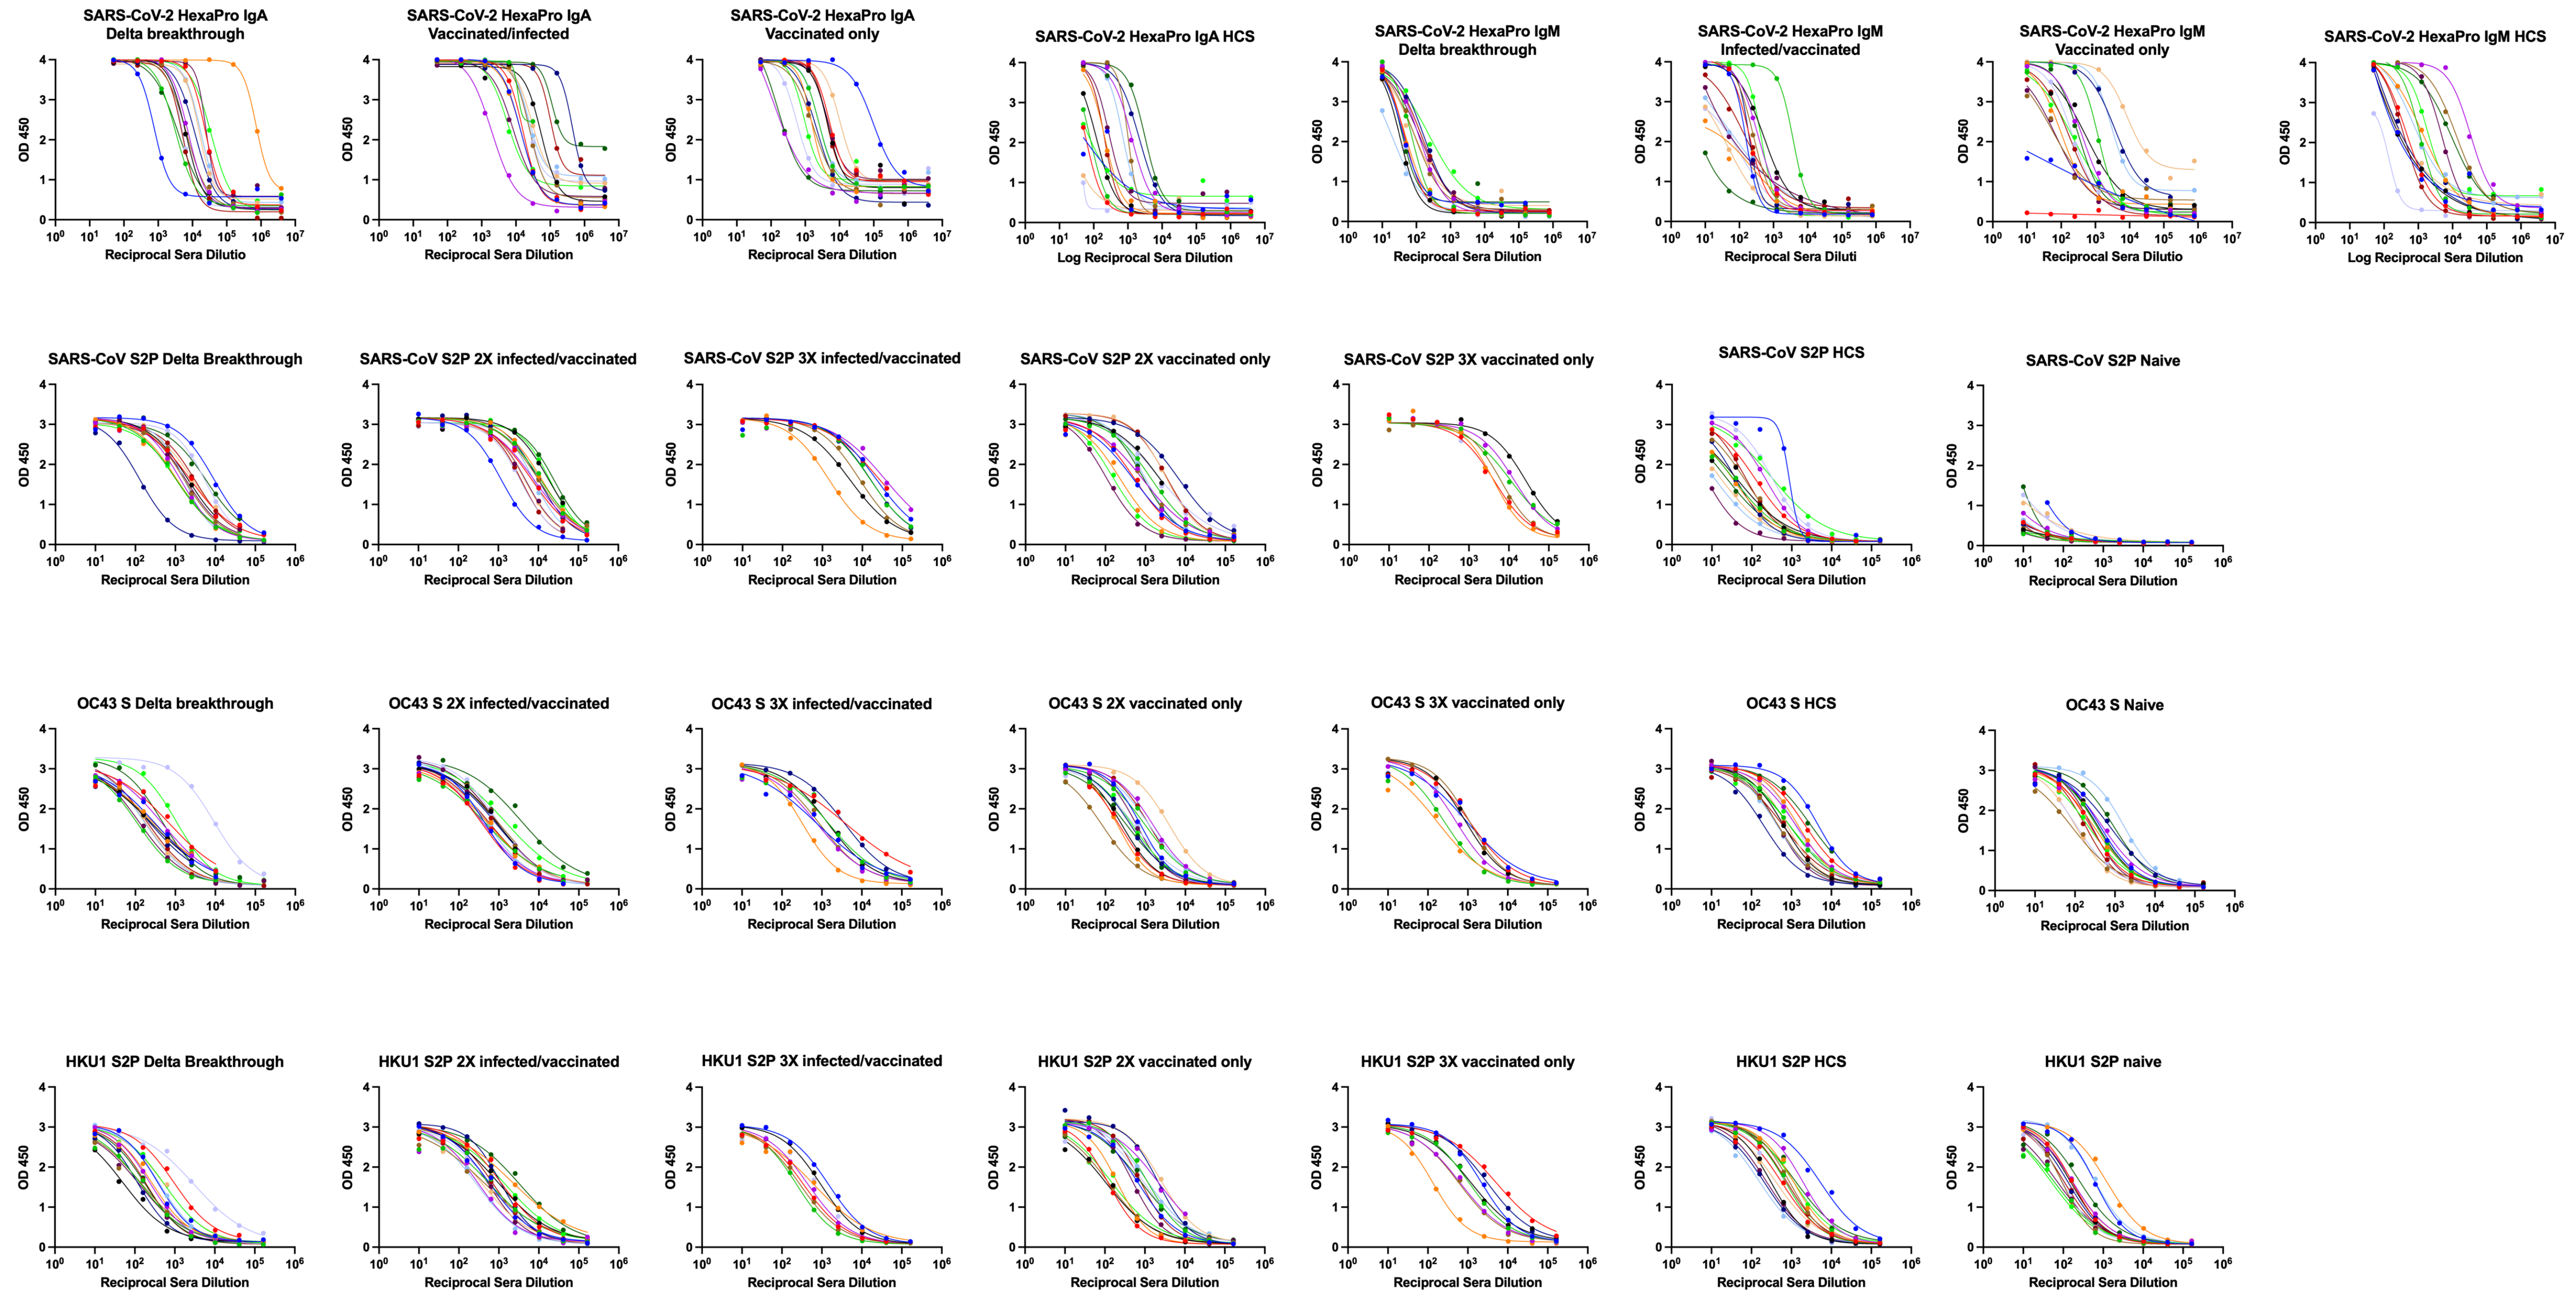

**Normalized neutralization curves using VSV pseudovirus on VeroE6-TMPRSS2 cells for breakthrough cases 30 days post infection.**

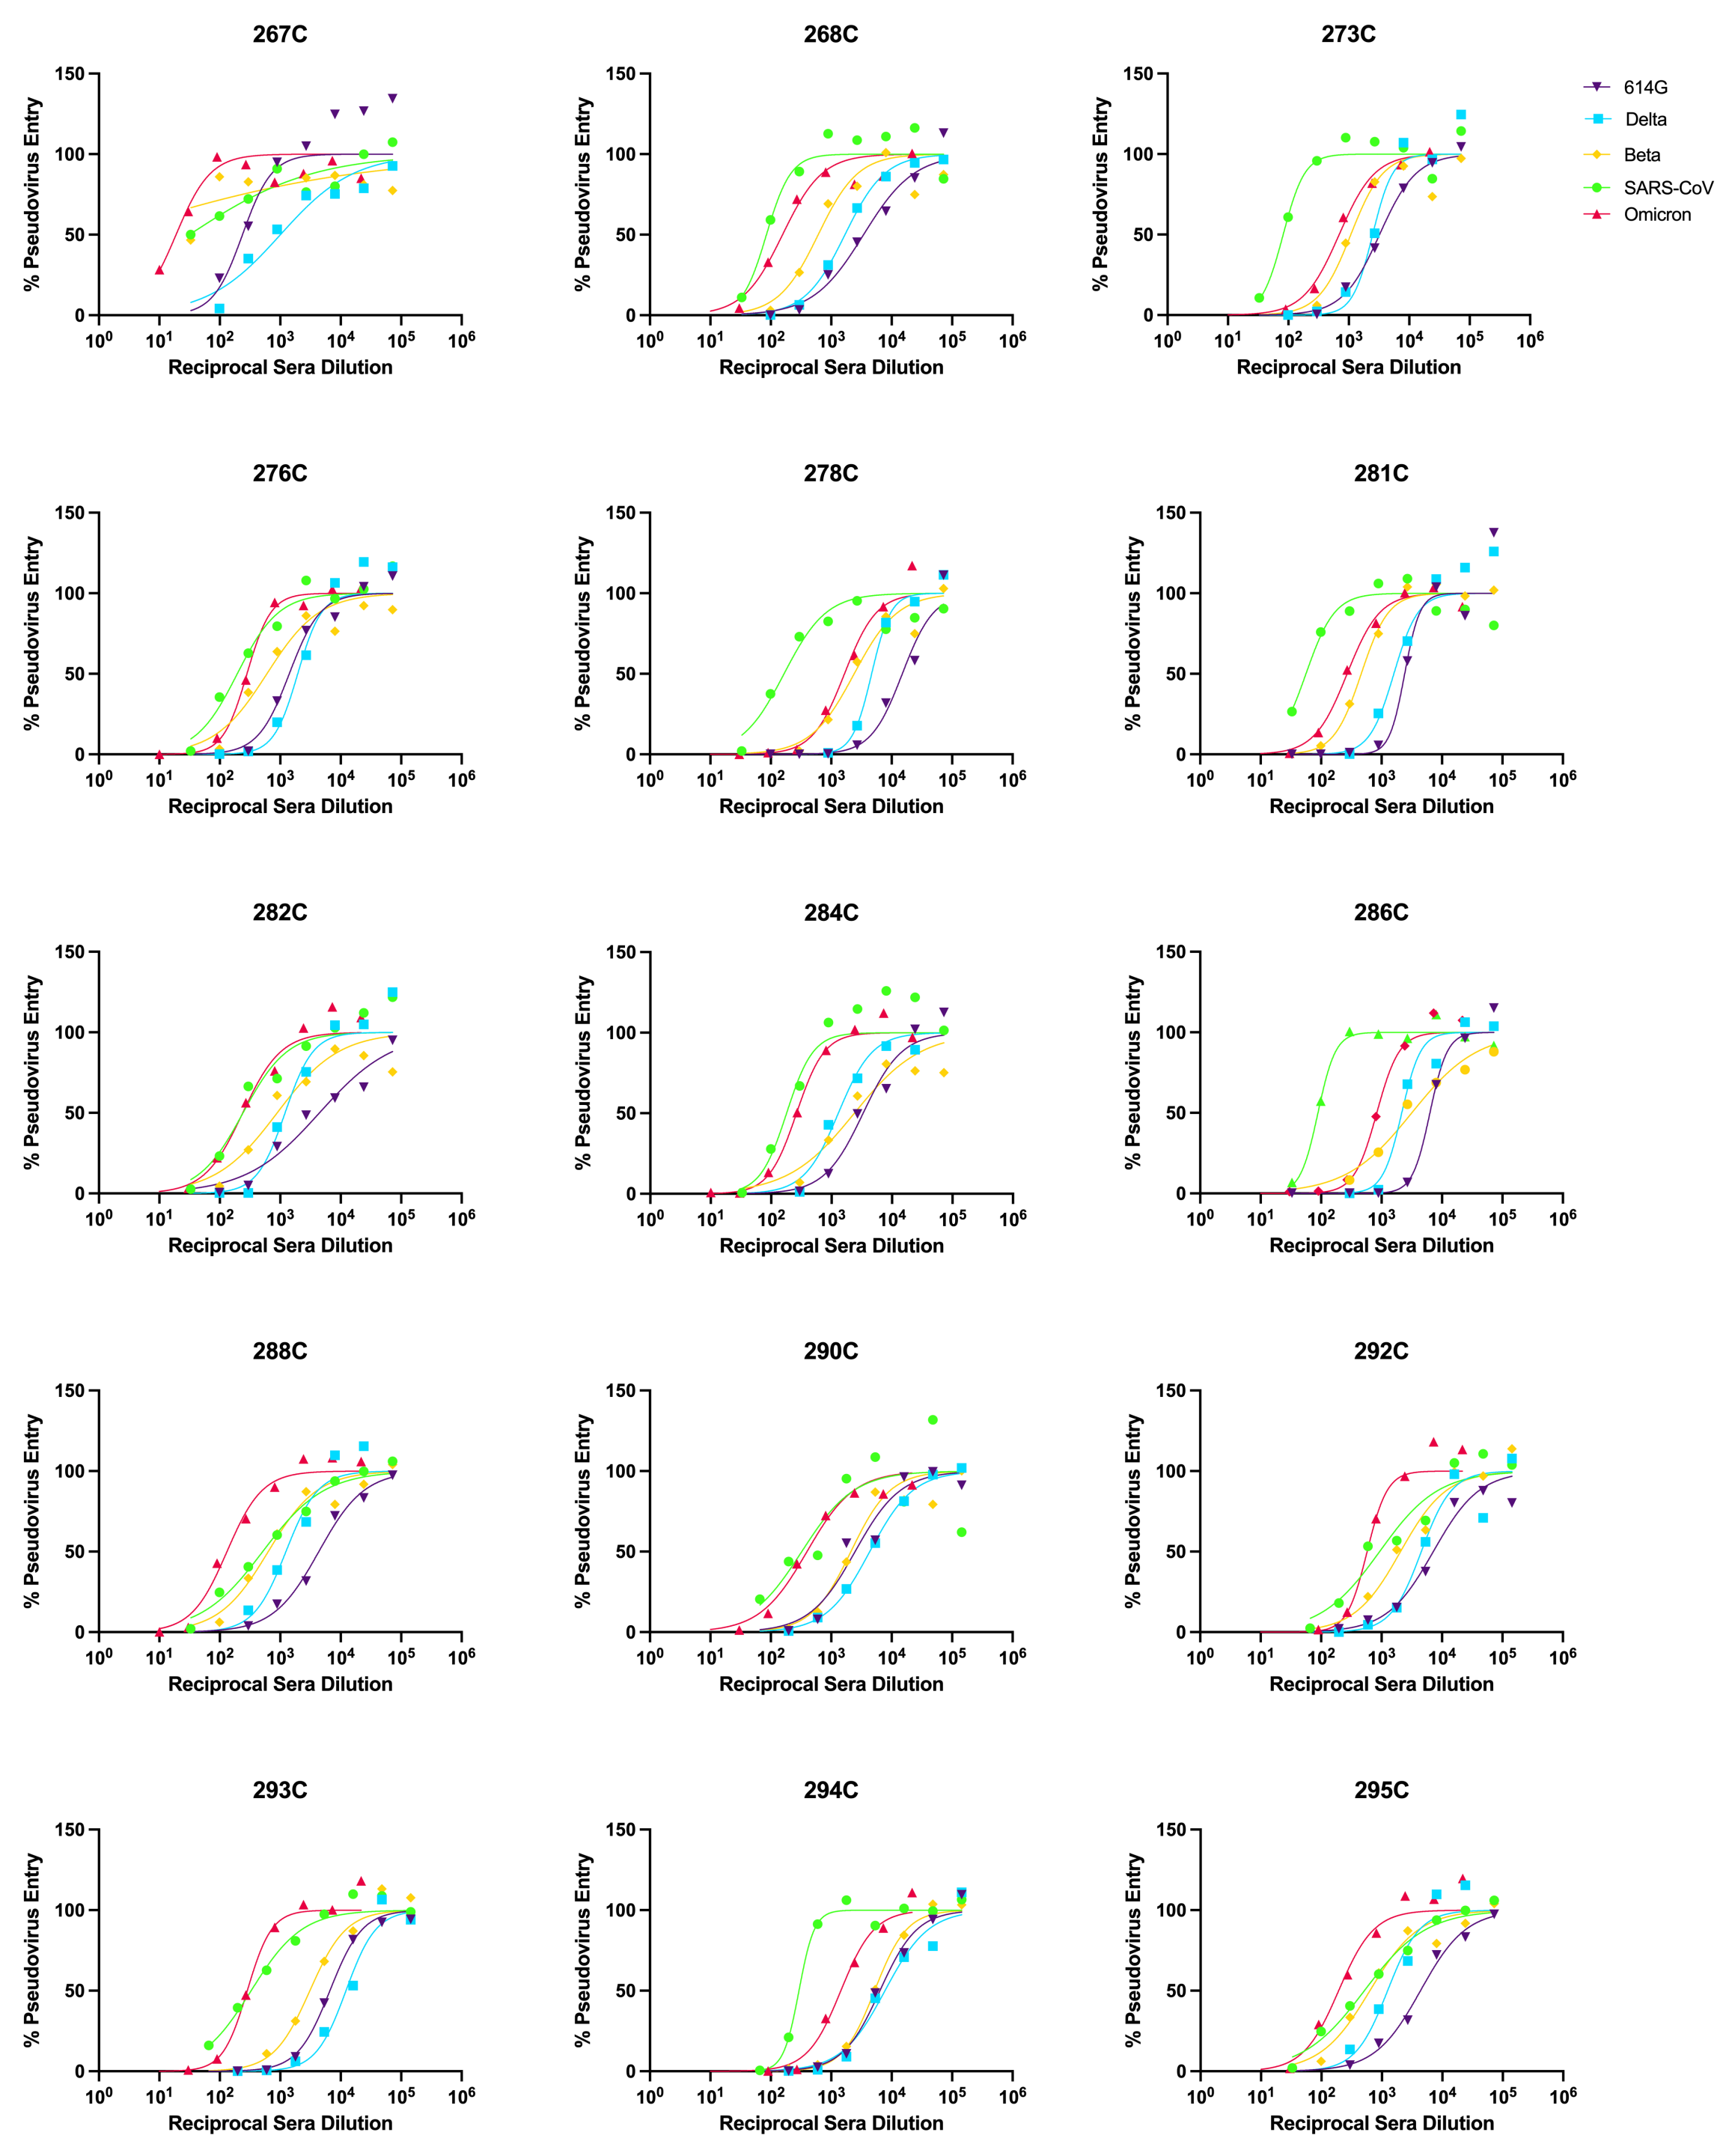

**Normalized neutralization curves using VSV pseudovirus on VeroE6-TMPRSS2 cells for breakthrough cases 60 days post infection.**

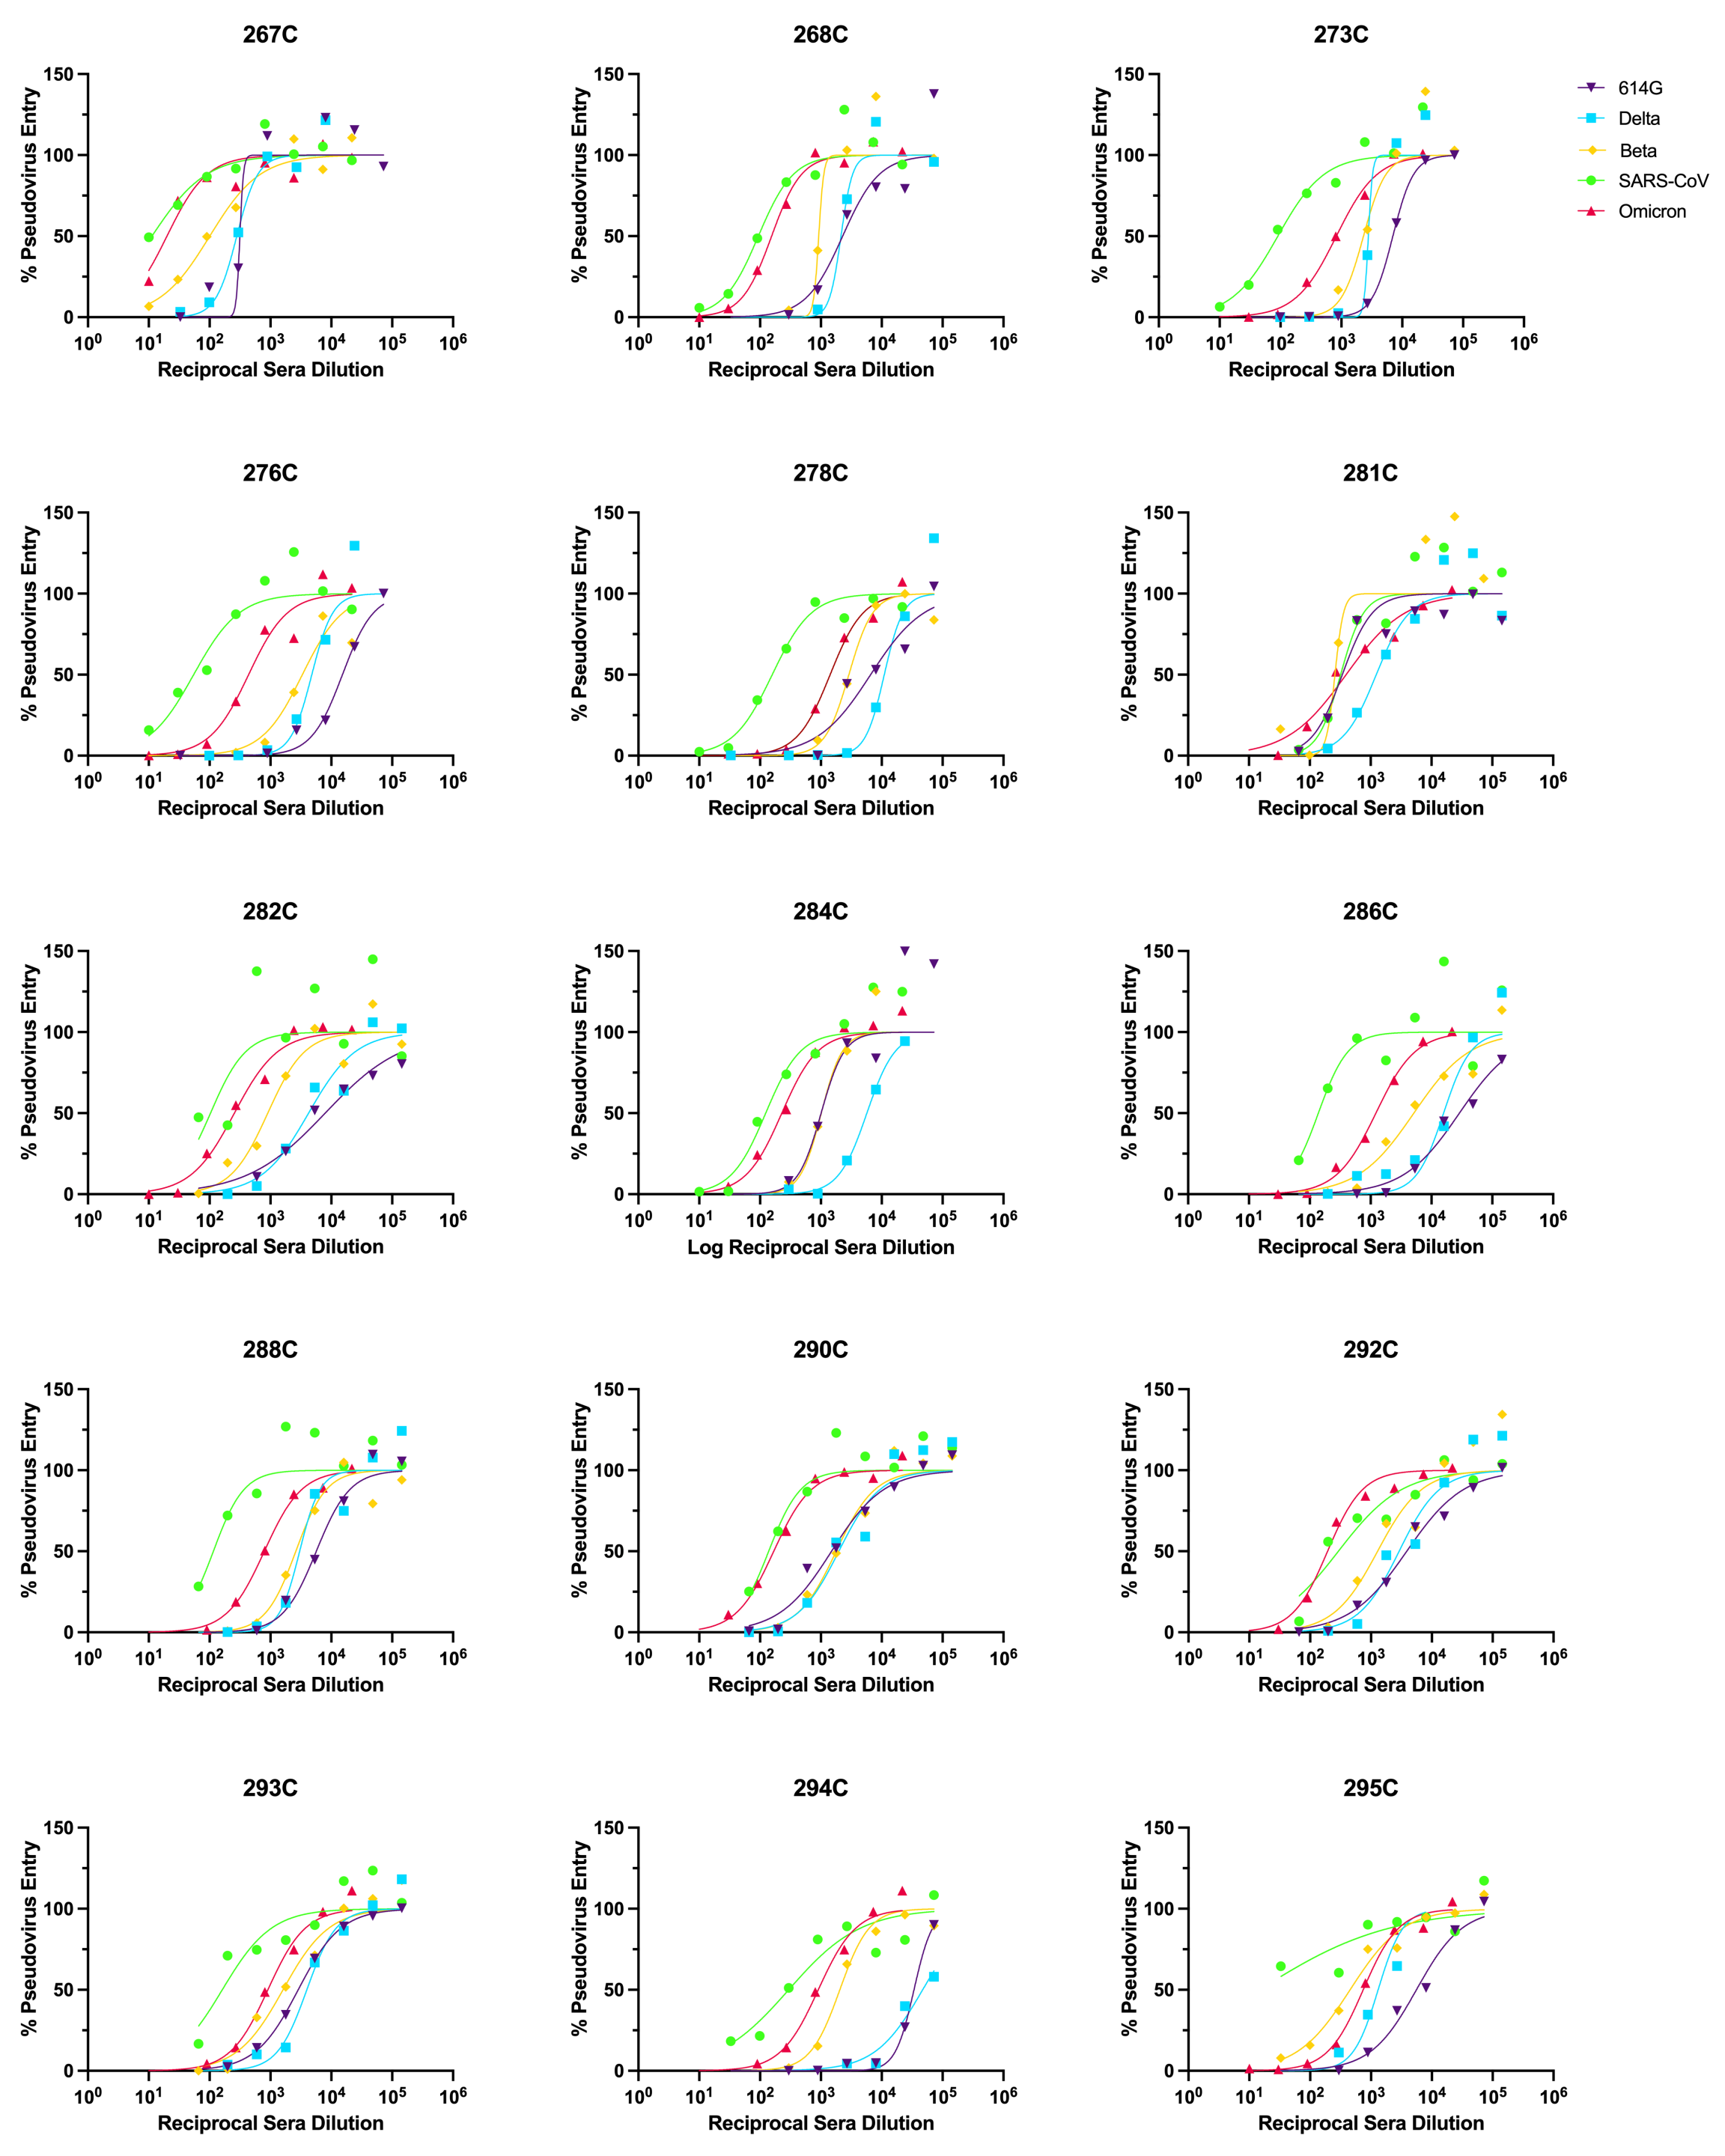

**Normalized neutralization curves using VSV pseudovirus on VeroE6-TMPRSS2 cells for 2X infected/vaccinated subjects 10 days post second vaccination.**

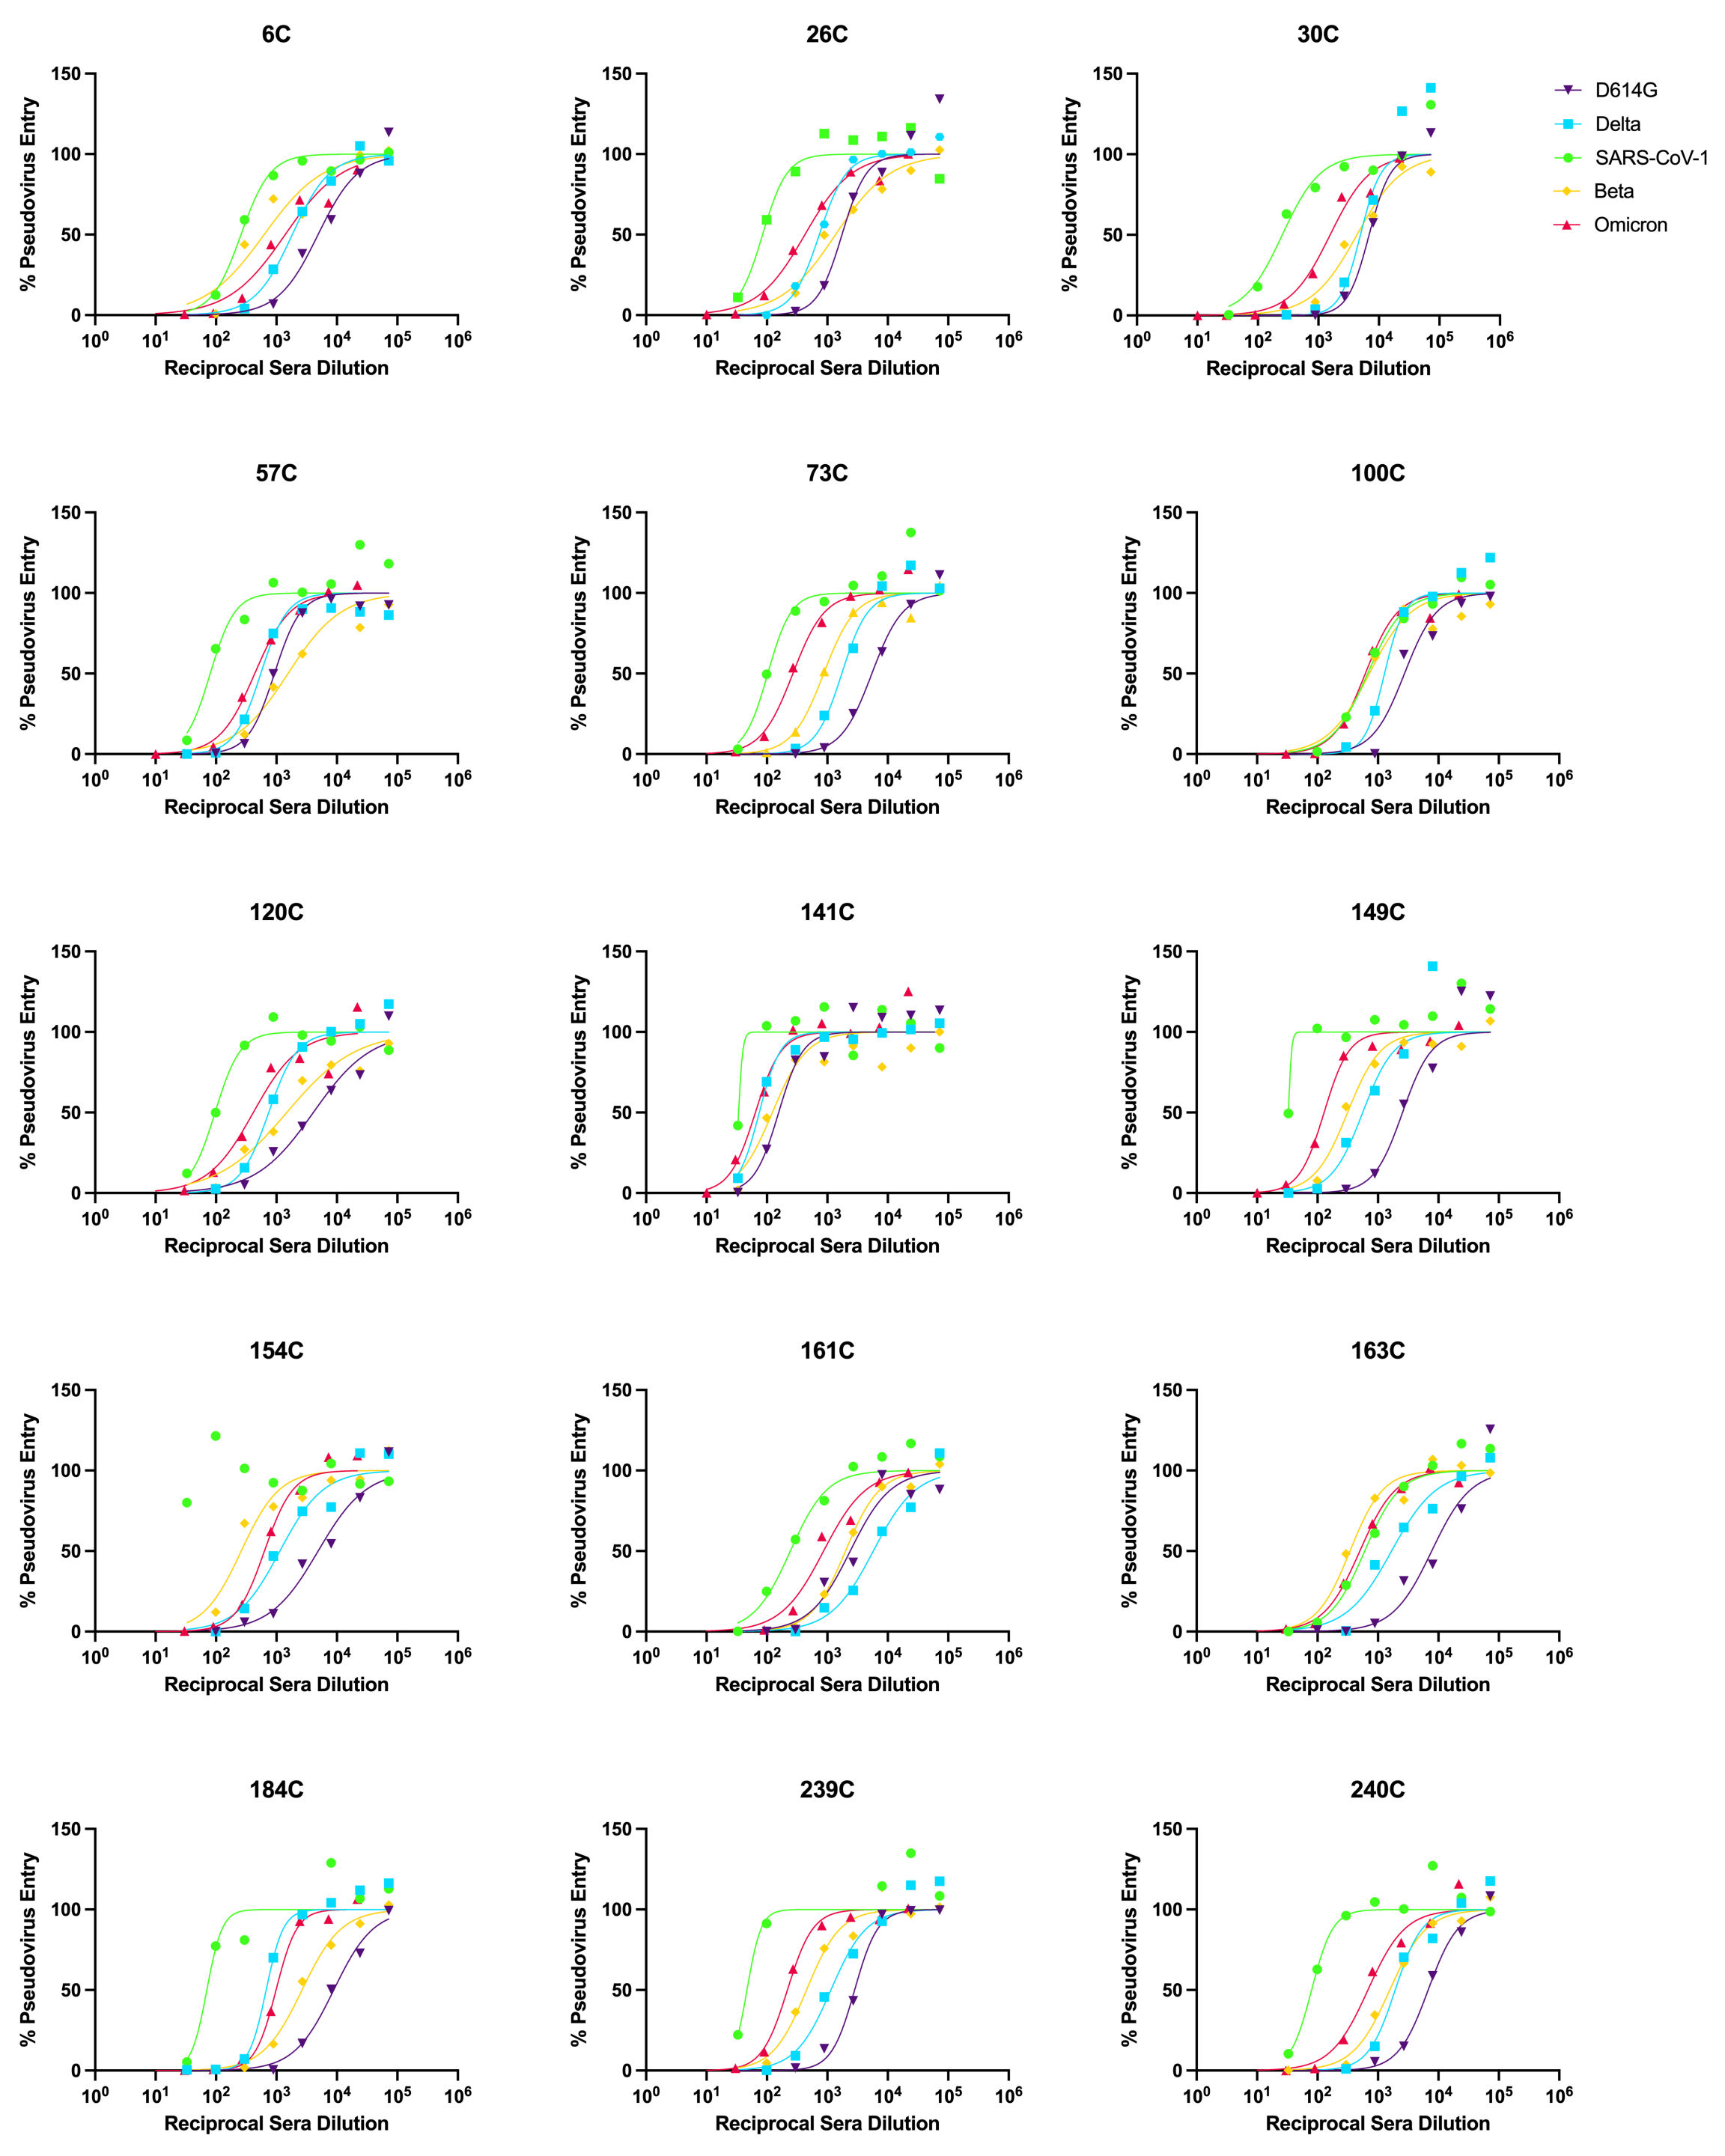

**Normalized neutralization curves using VSV pseudovirus on VeroE6-TMPRSS2 cells for 2X infected/vaccinated subjects 112 days post second vaccination.**

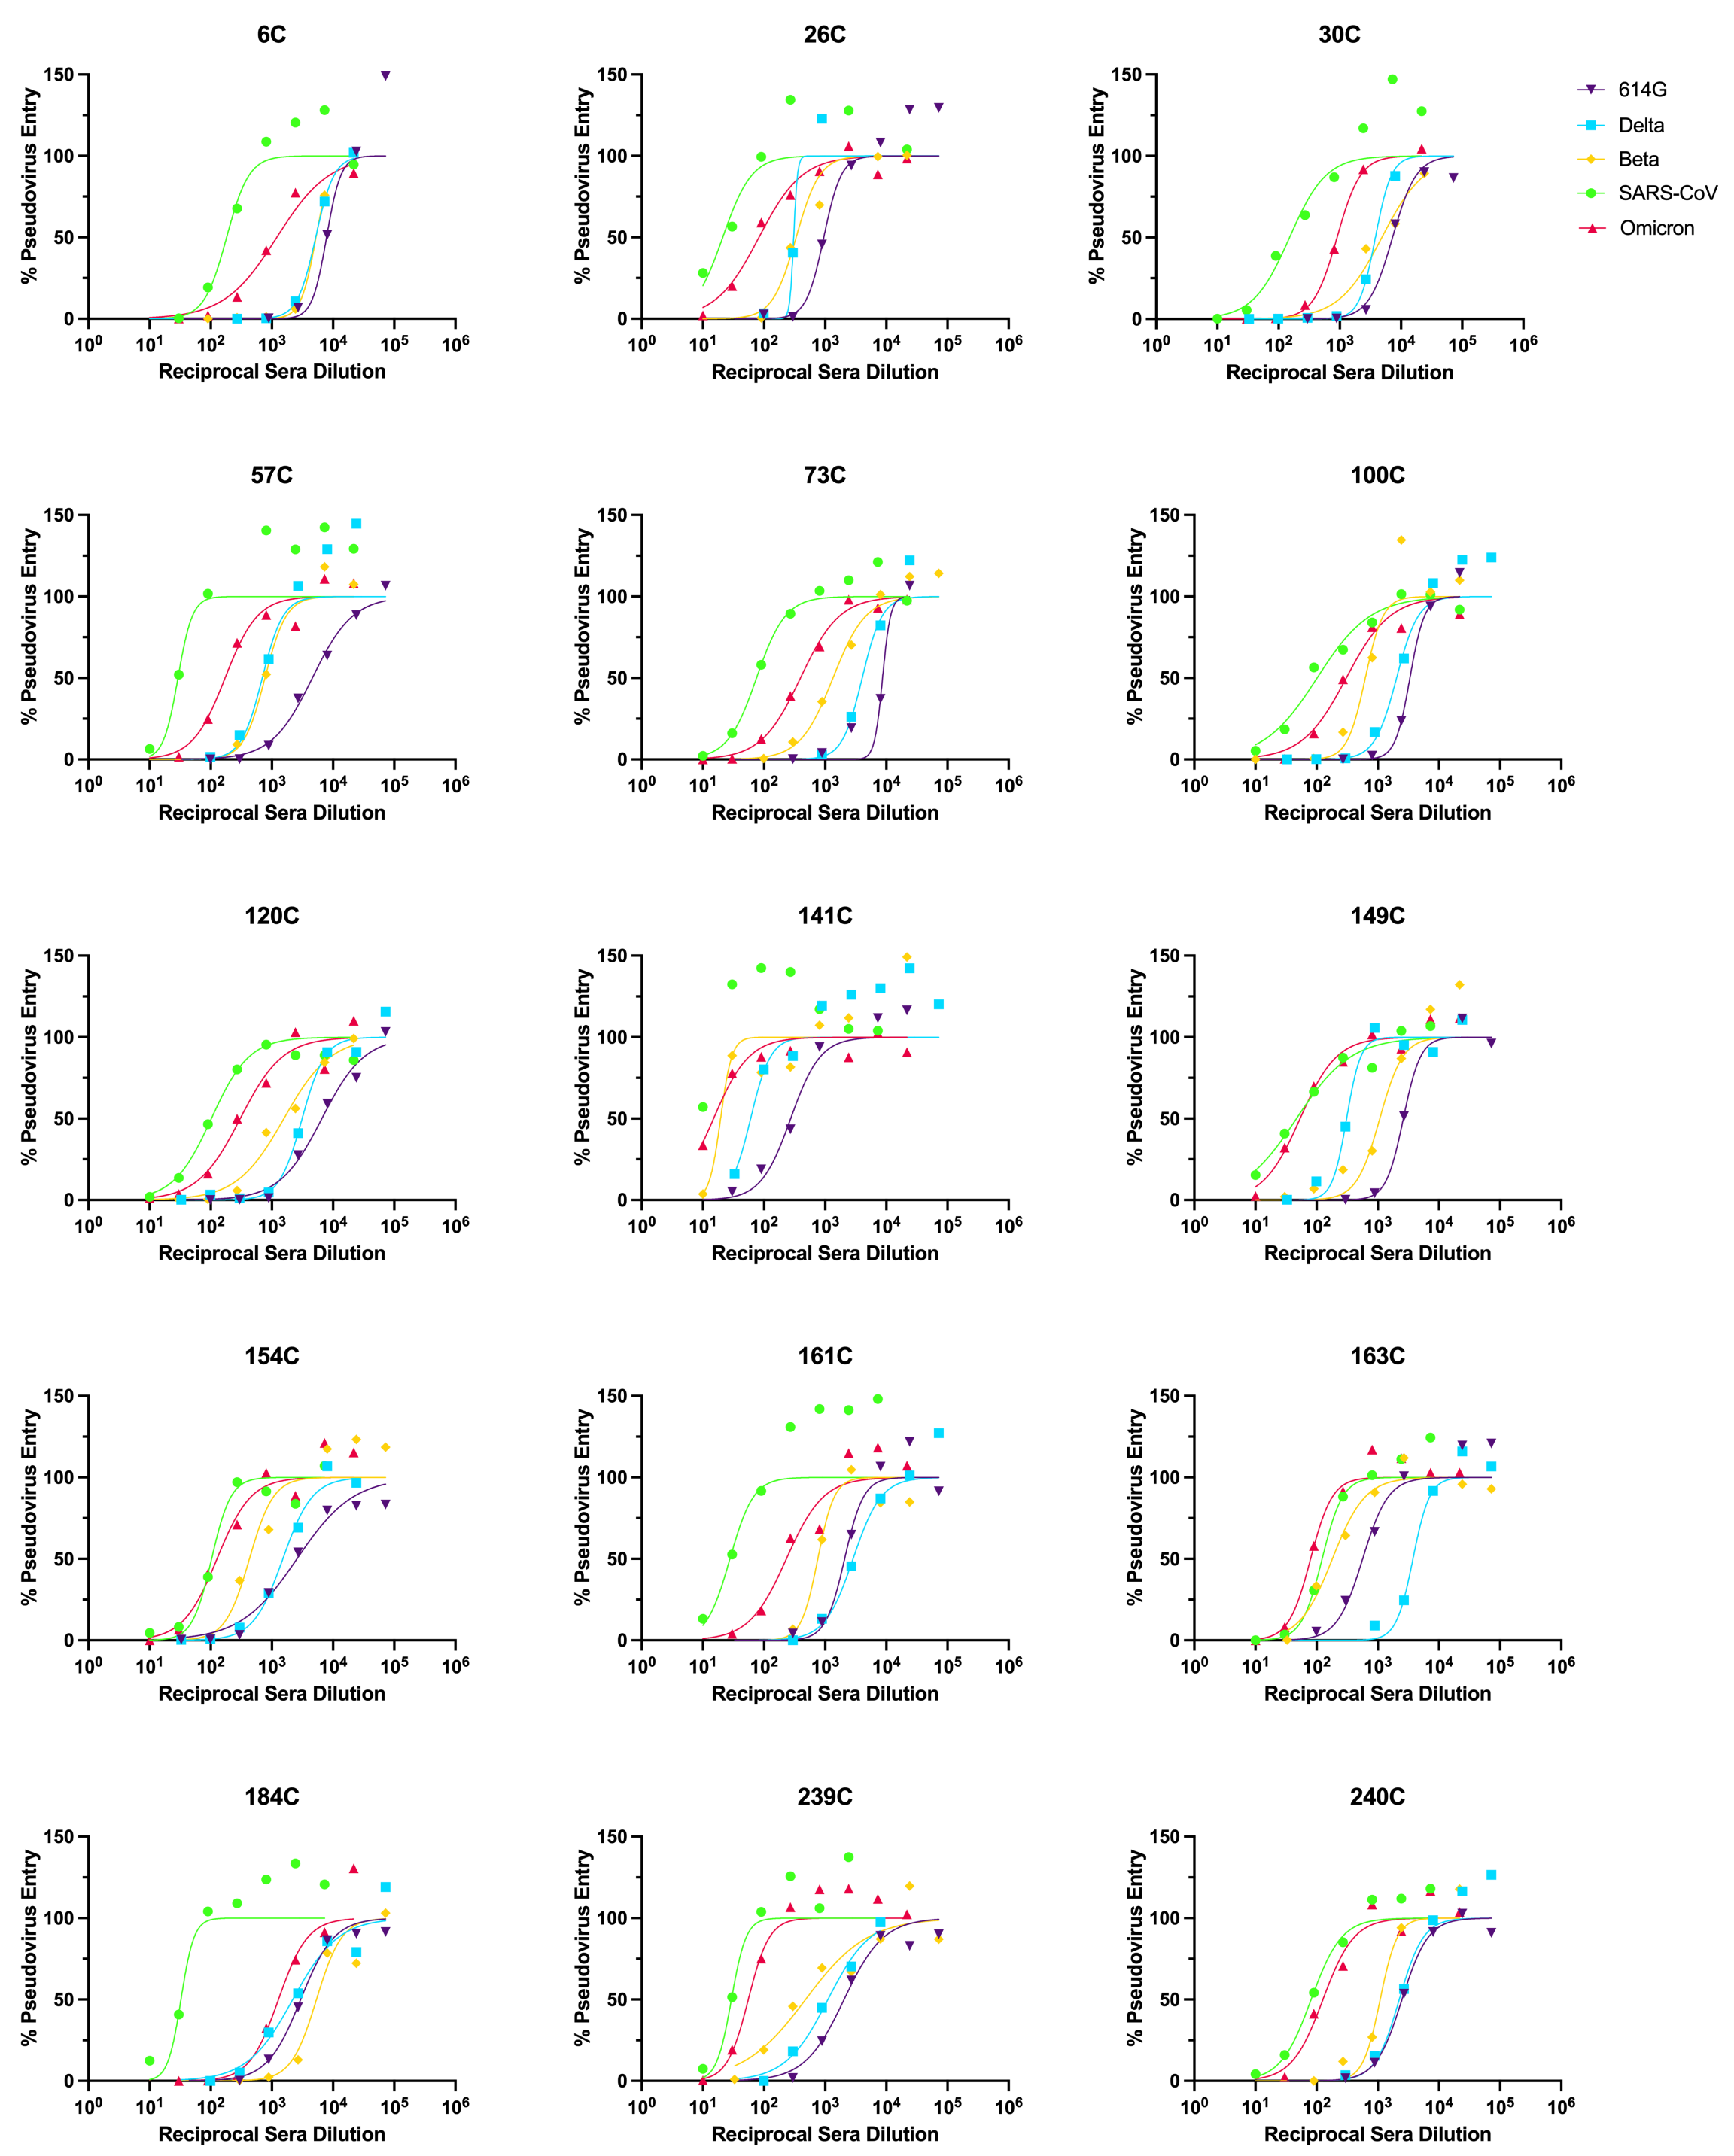

**Normalized neutralization curves using VSV pseudovirus on VeroE6-TMPRSS2 cells for 2X infected/vaccinated subjects 180 days post second vaccination.**

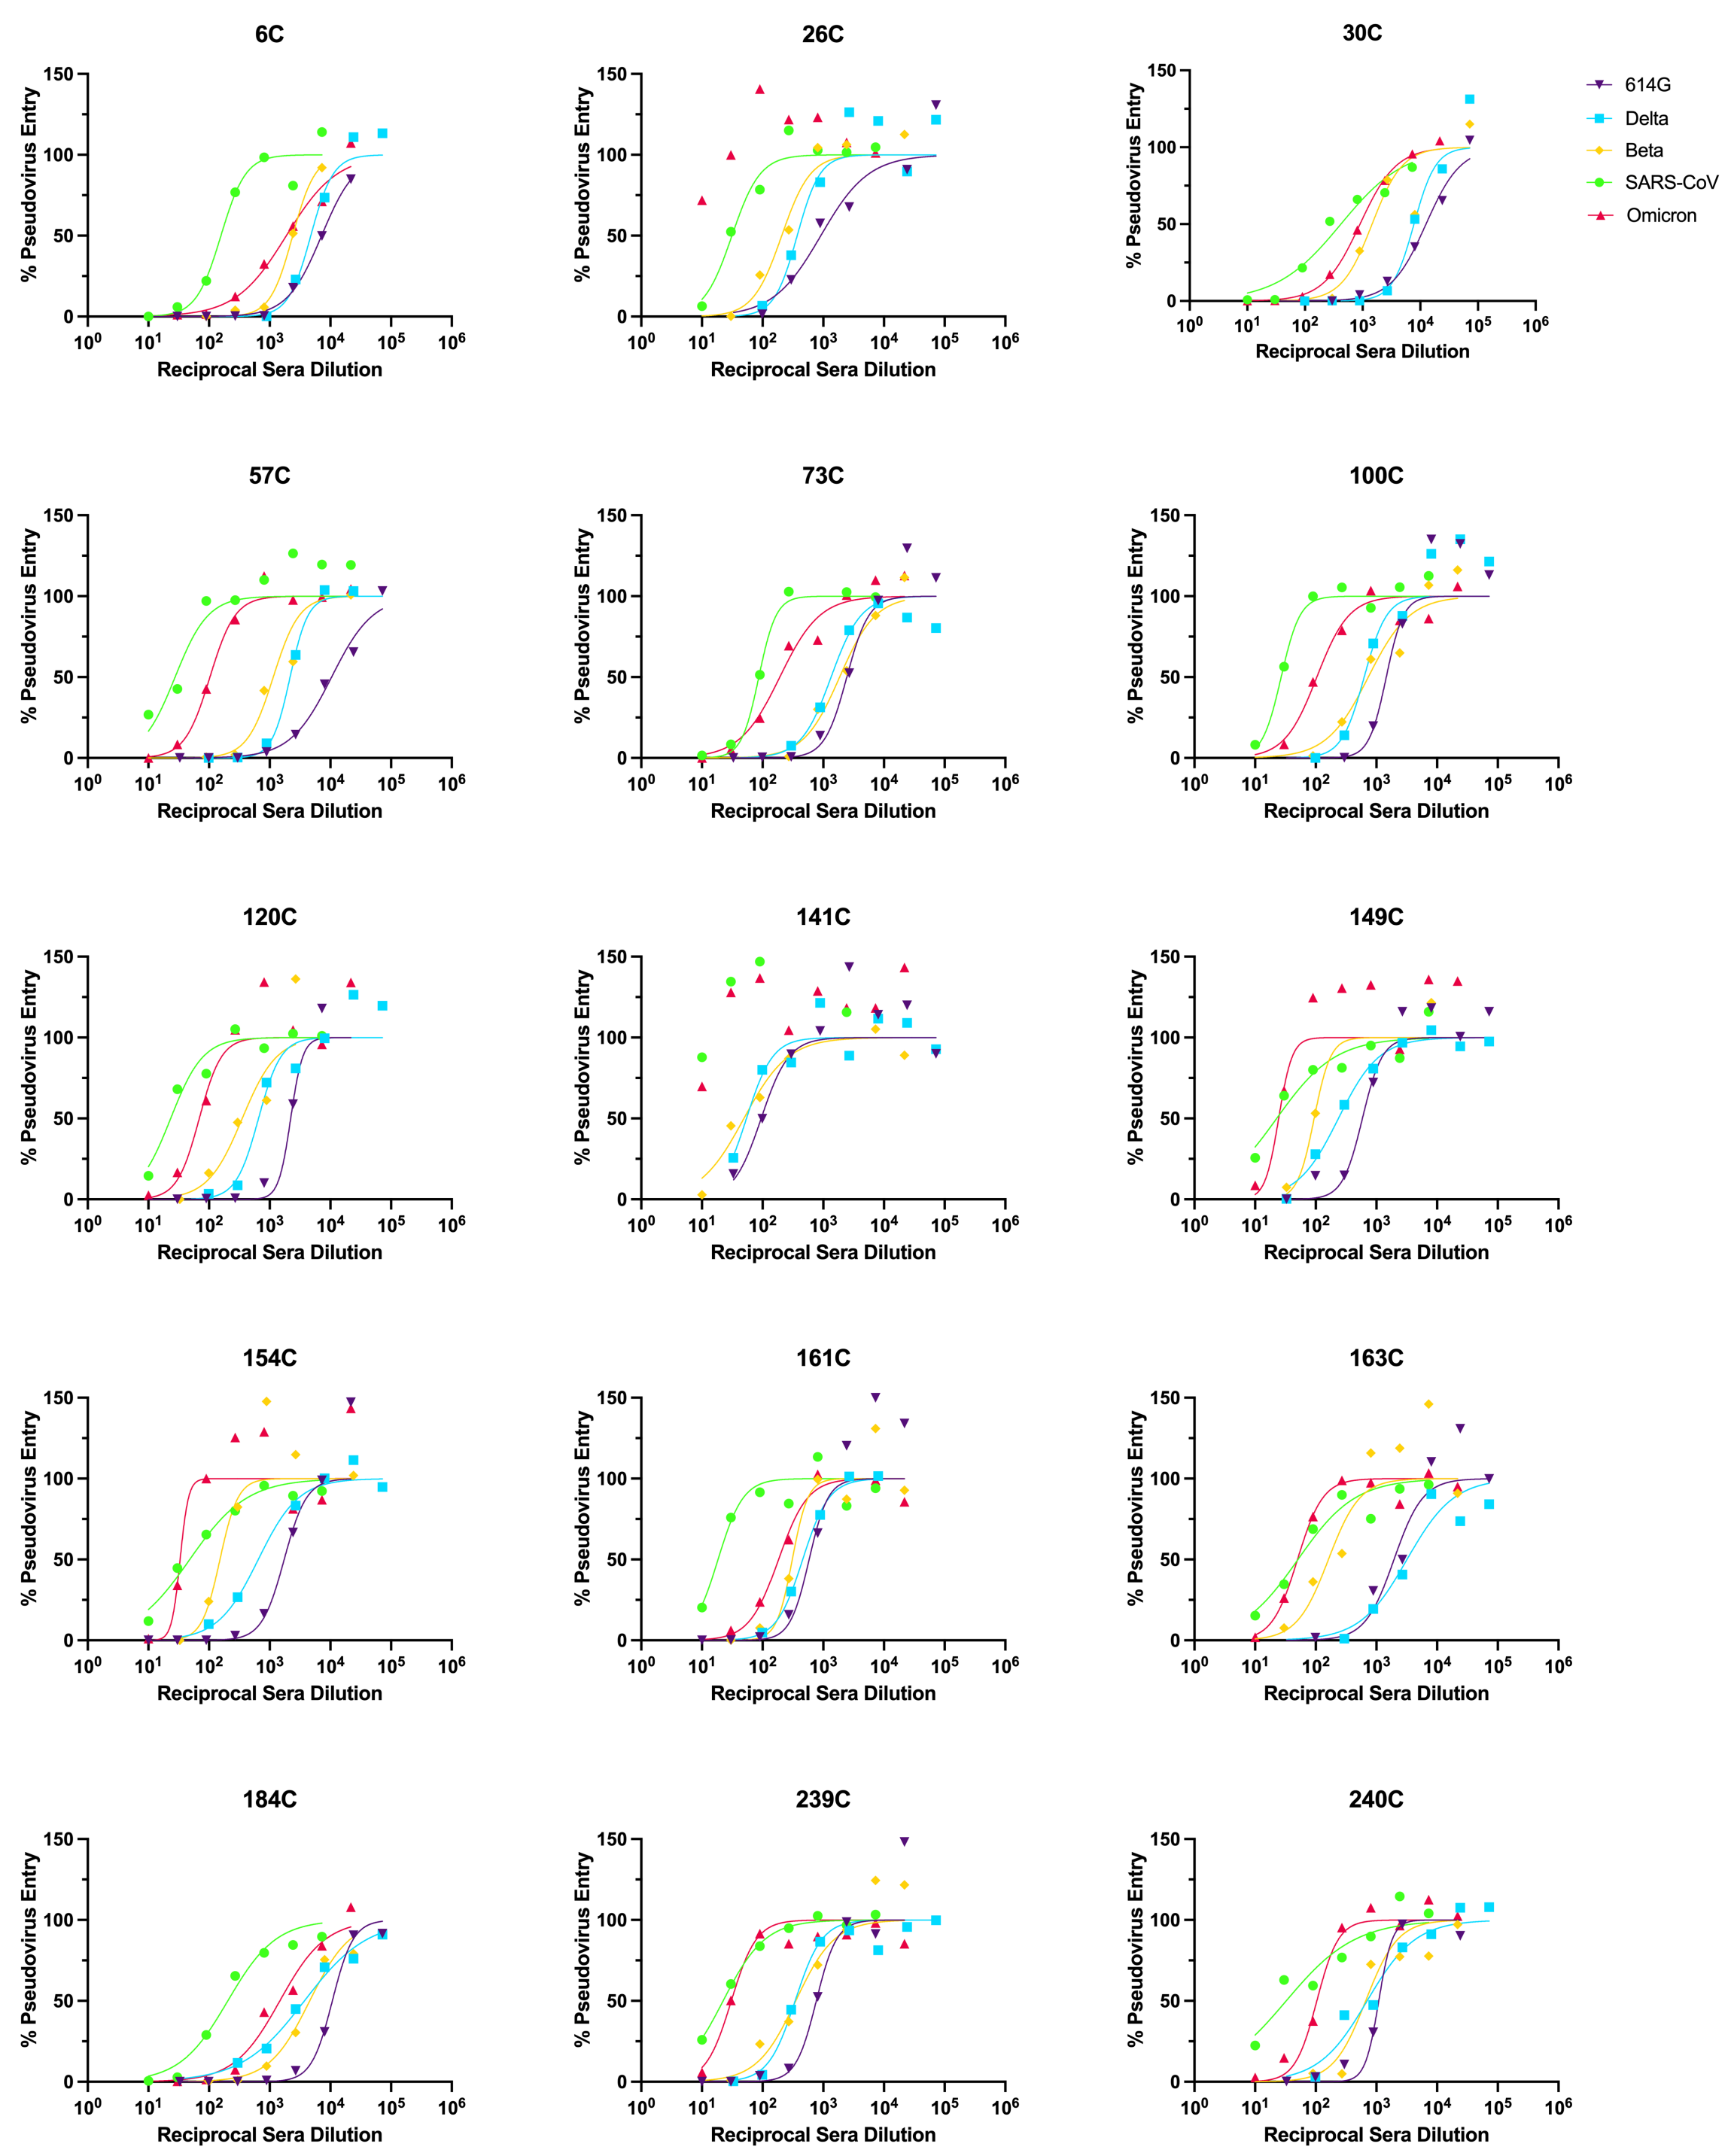



Normalized neutralization curves using VSV pseudovirus on VeroE6-TMPRSS2 cells for 3X infected/vaccinated subjects ~10 days post third vaccination.

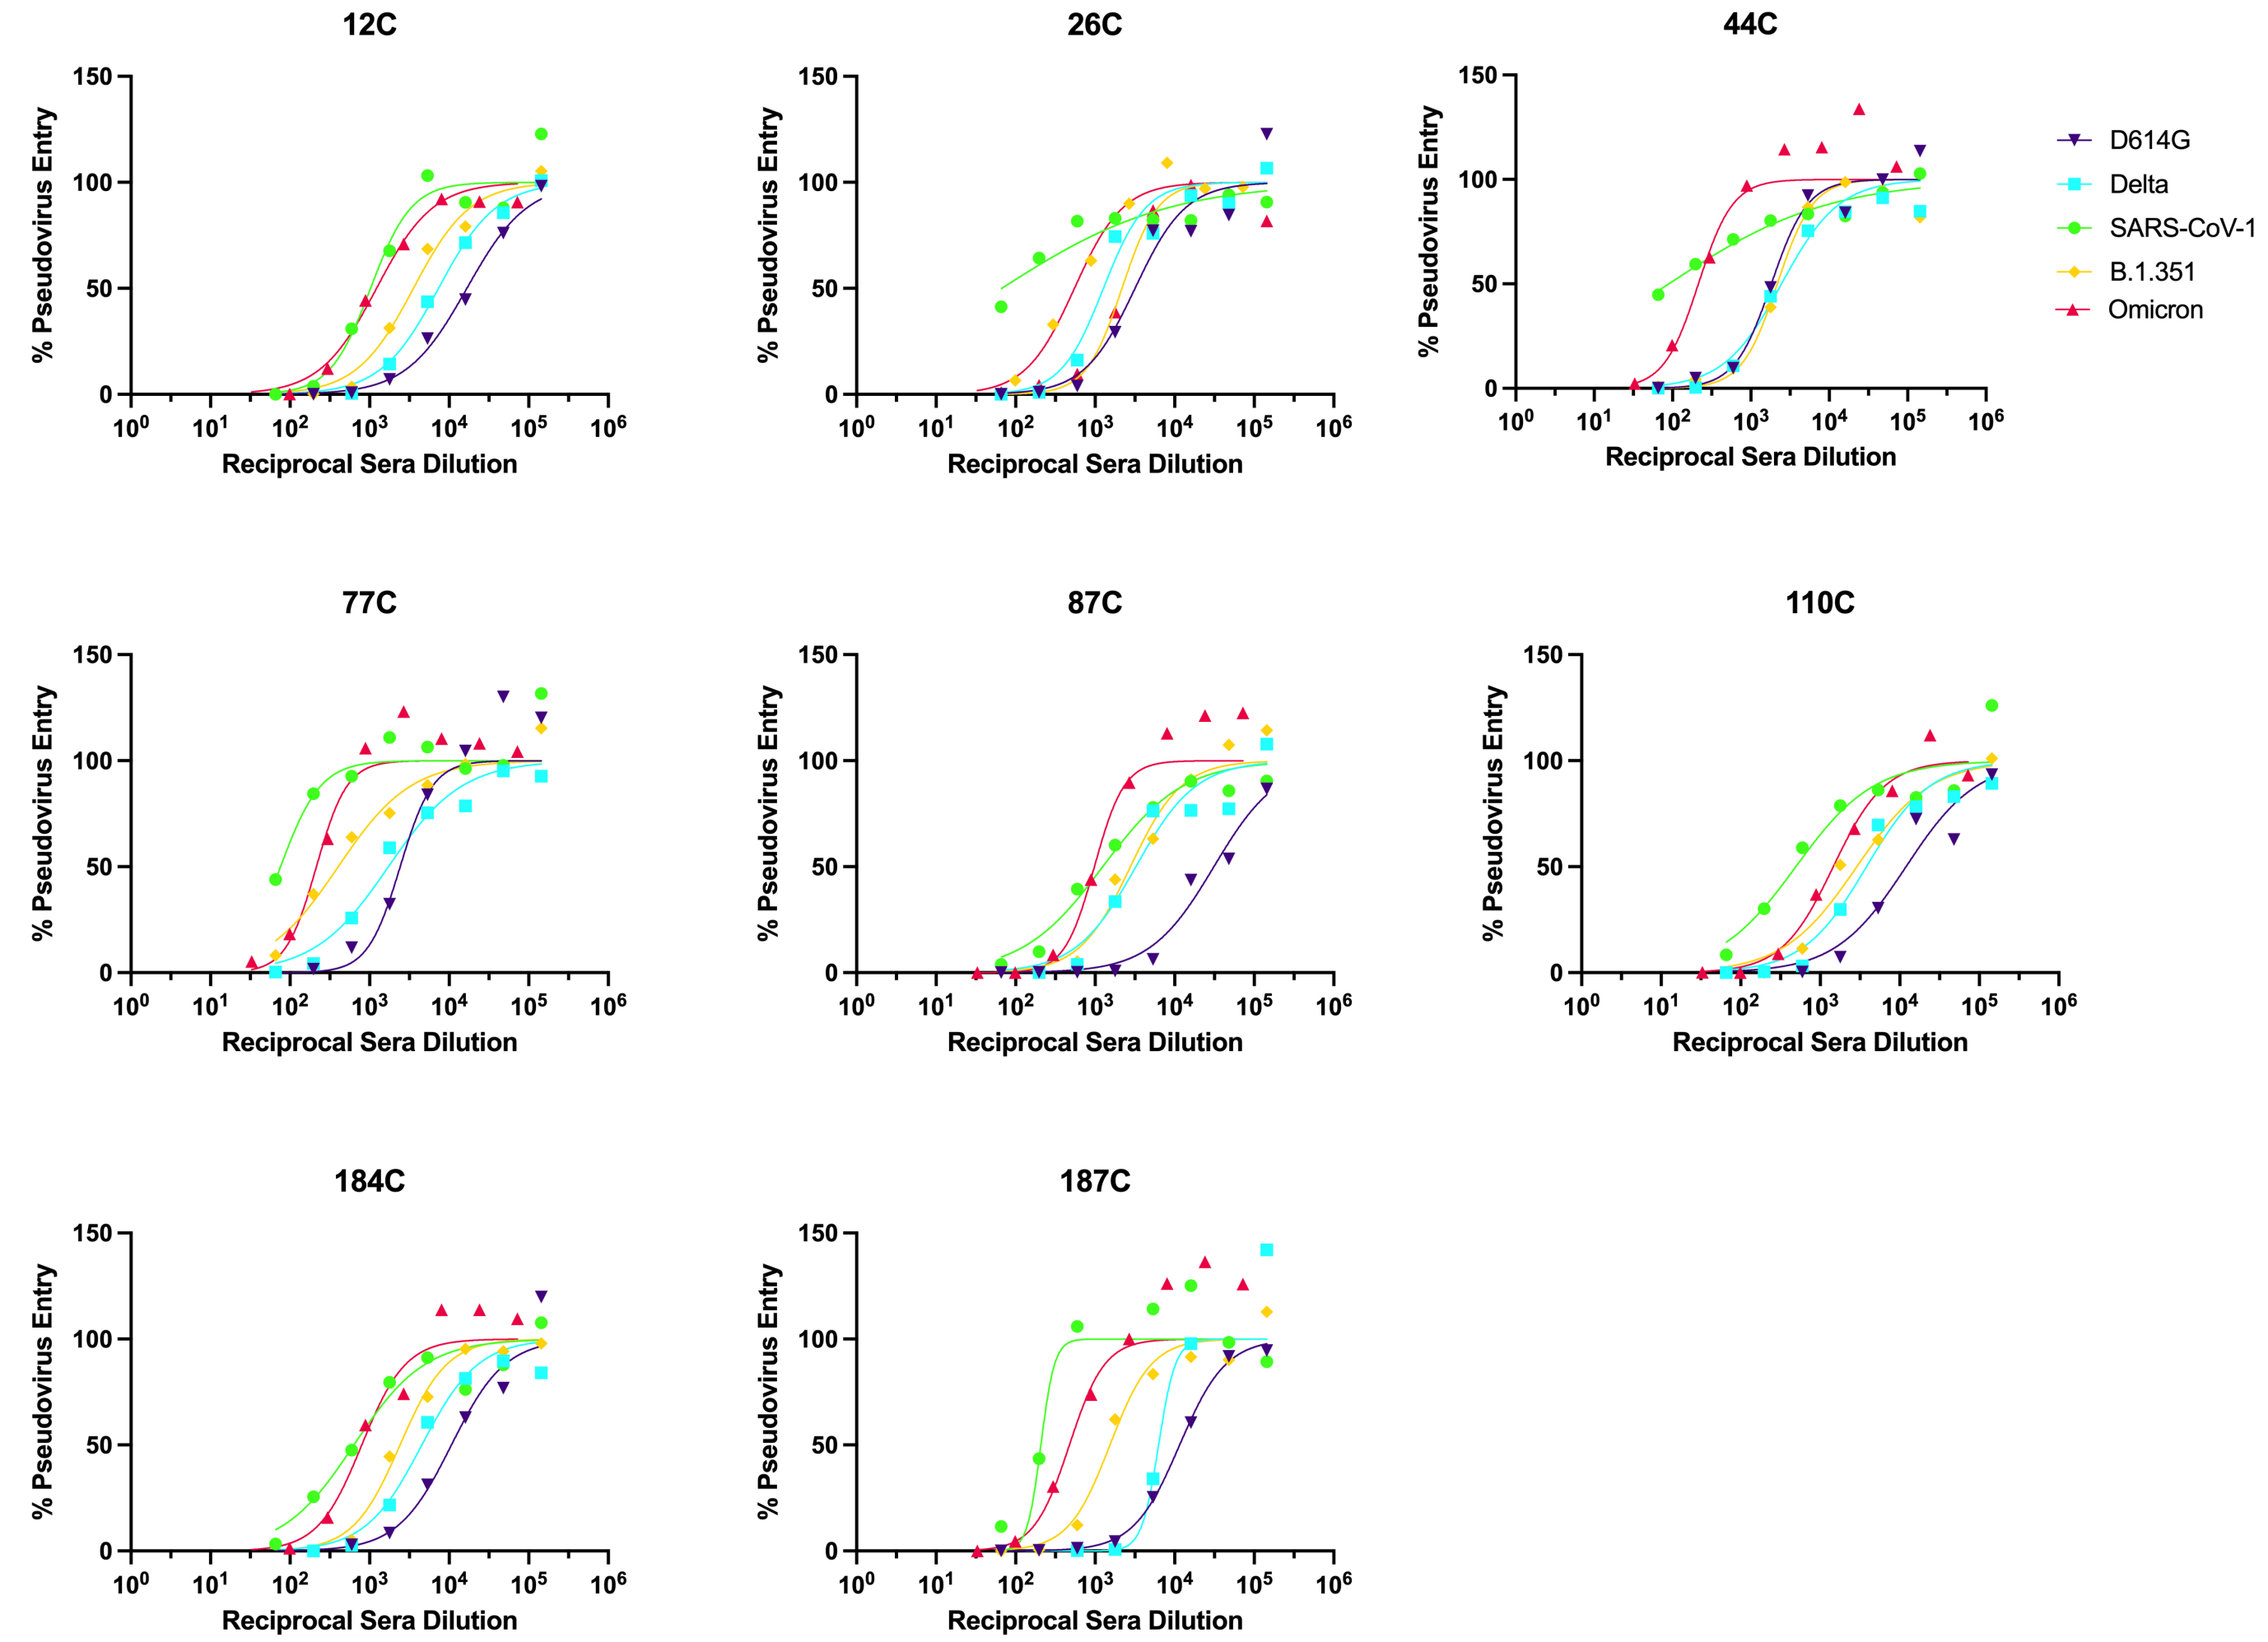

**Normalized neutralization curves using VSV pseudovirus on VeroE6-TMPRSS2 cells for 2X vaccinated-only subjects 10 days post second vaccination.**

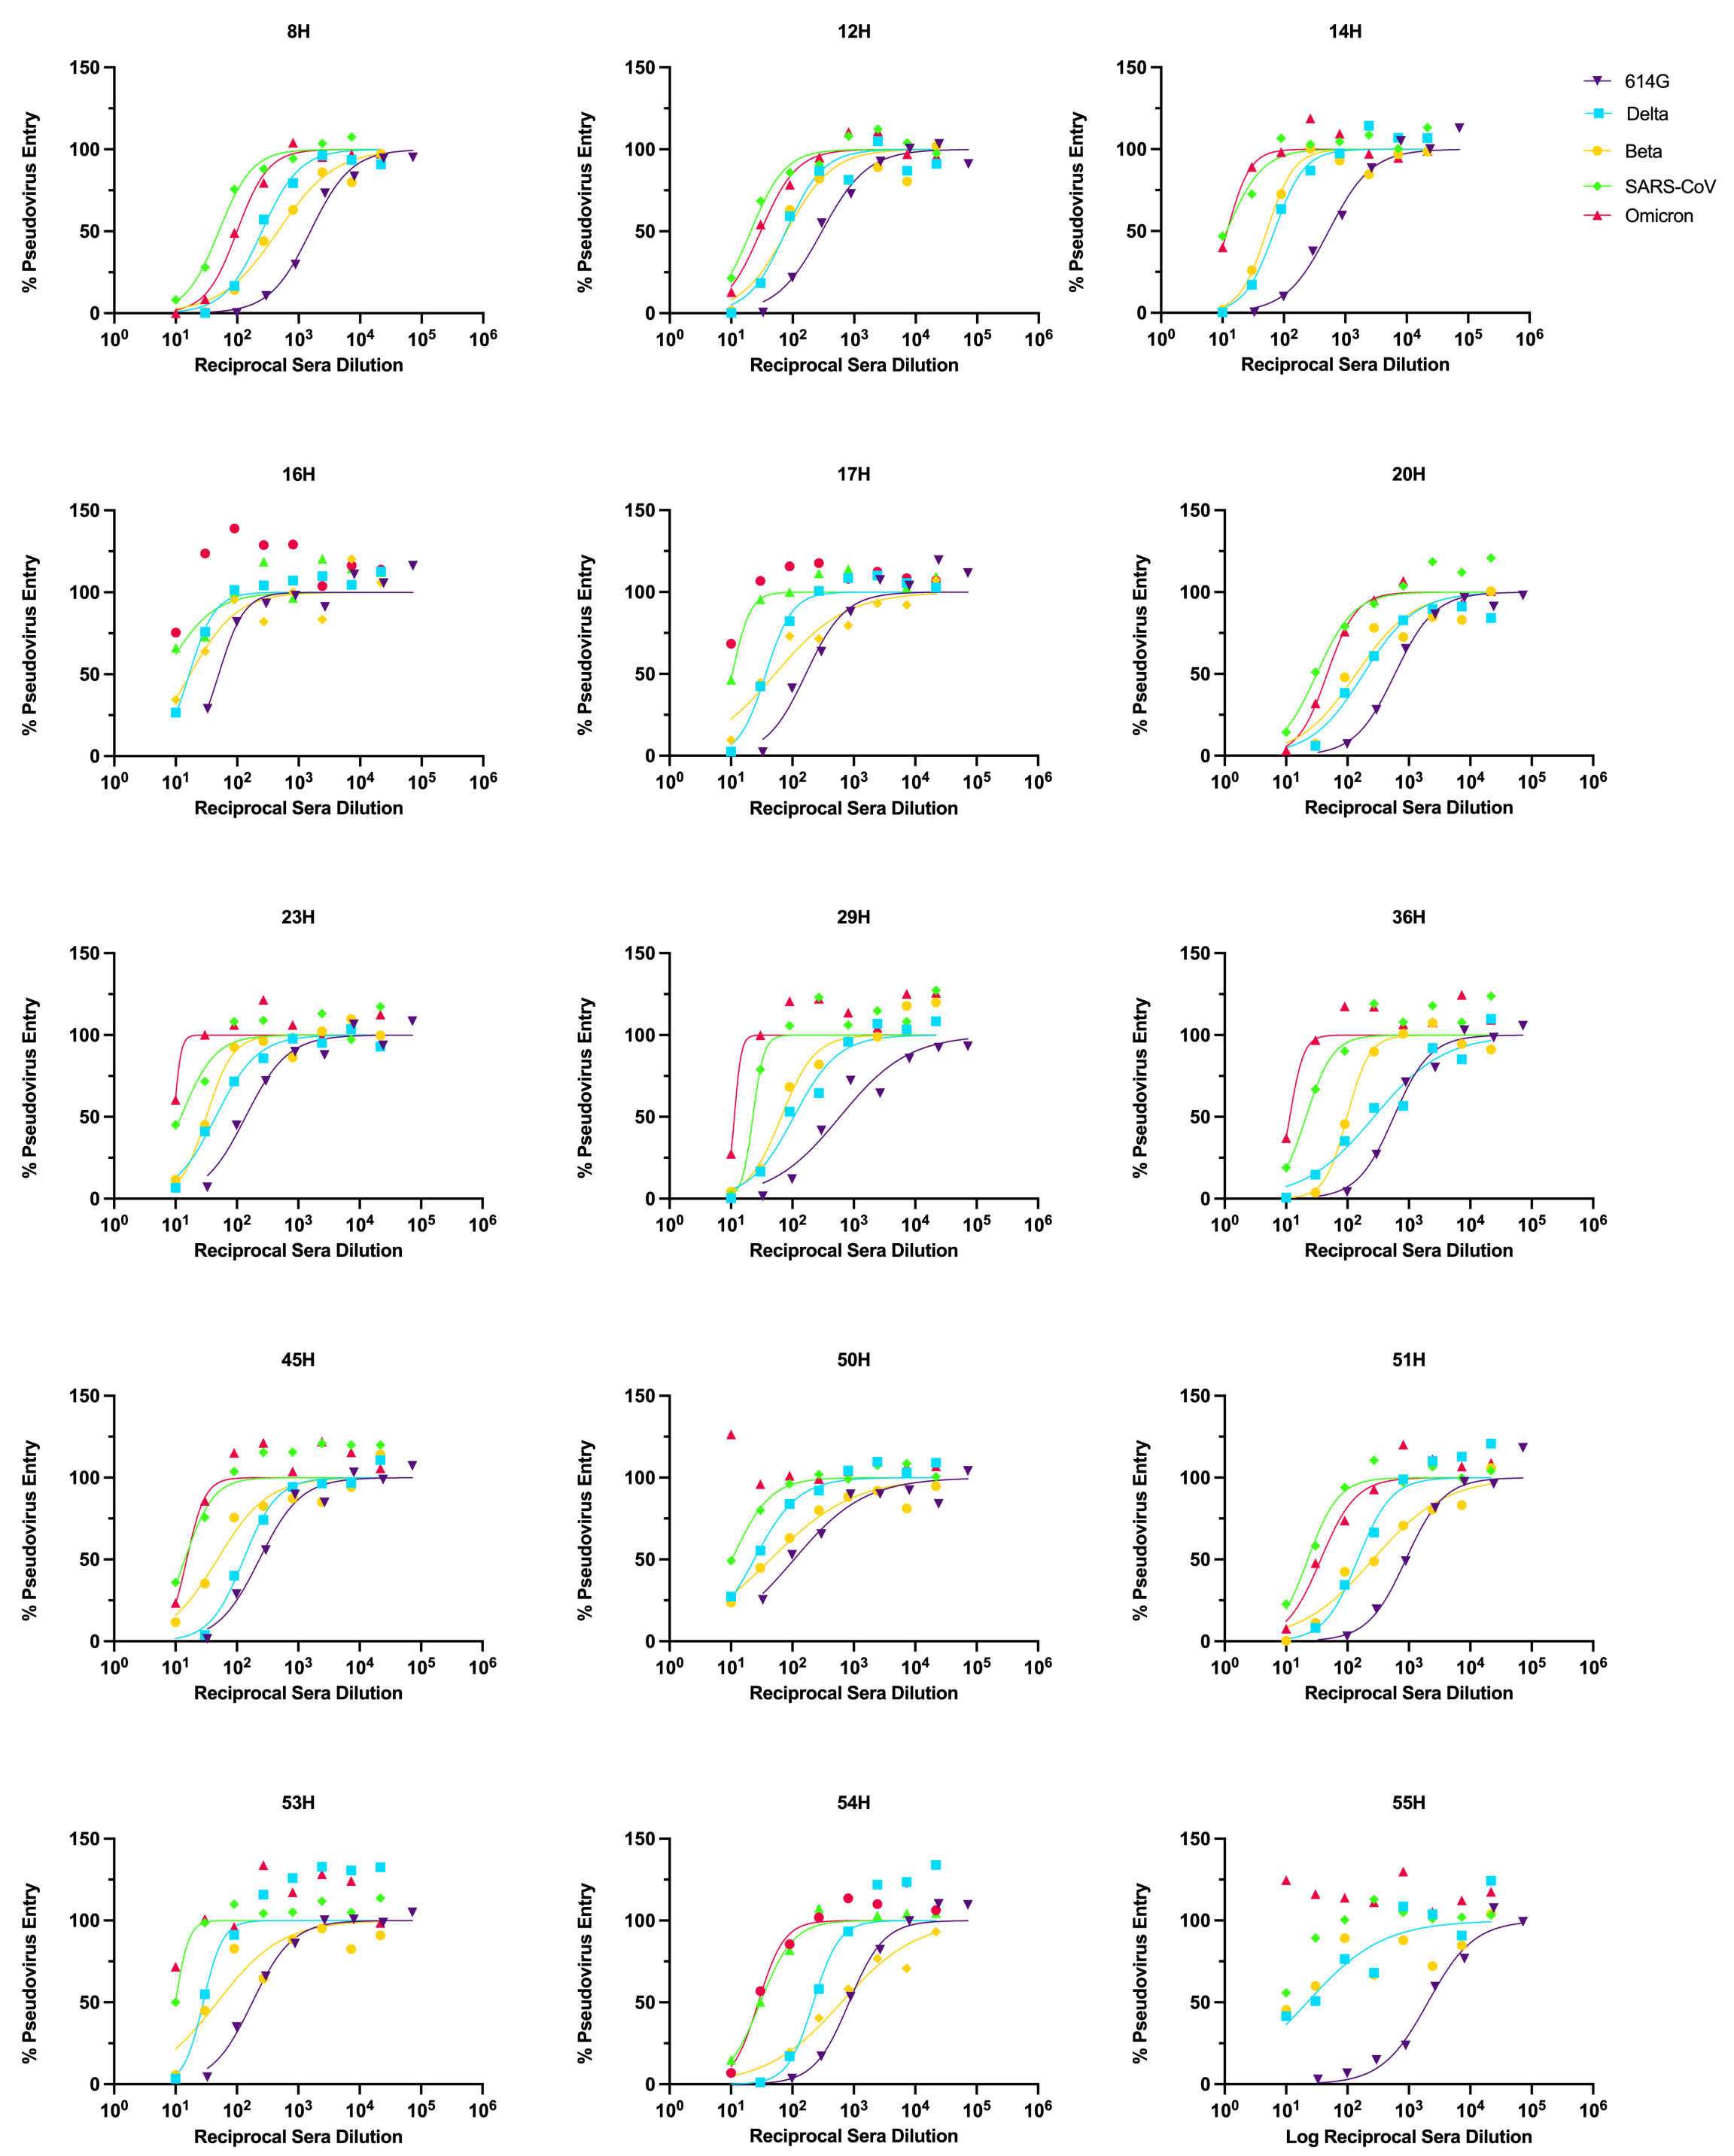

**Normalized neutralization curves using VSV pseudovirus on VeroE6-TMPRSS2 cells for 2X vaccinated-only subjects 112 days post second vaccination.**

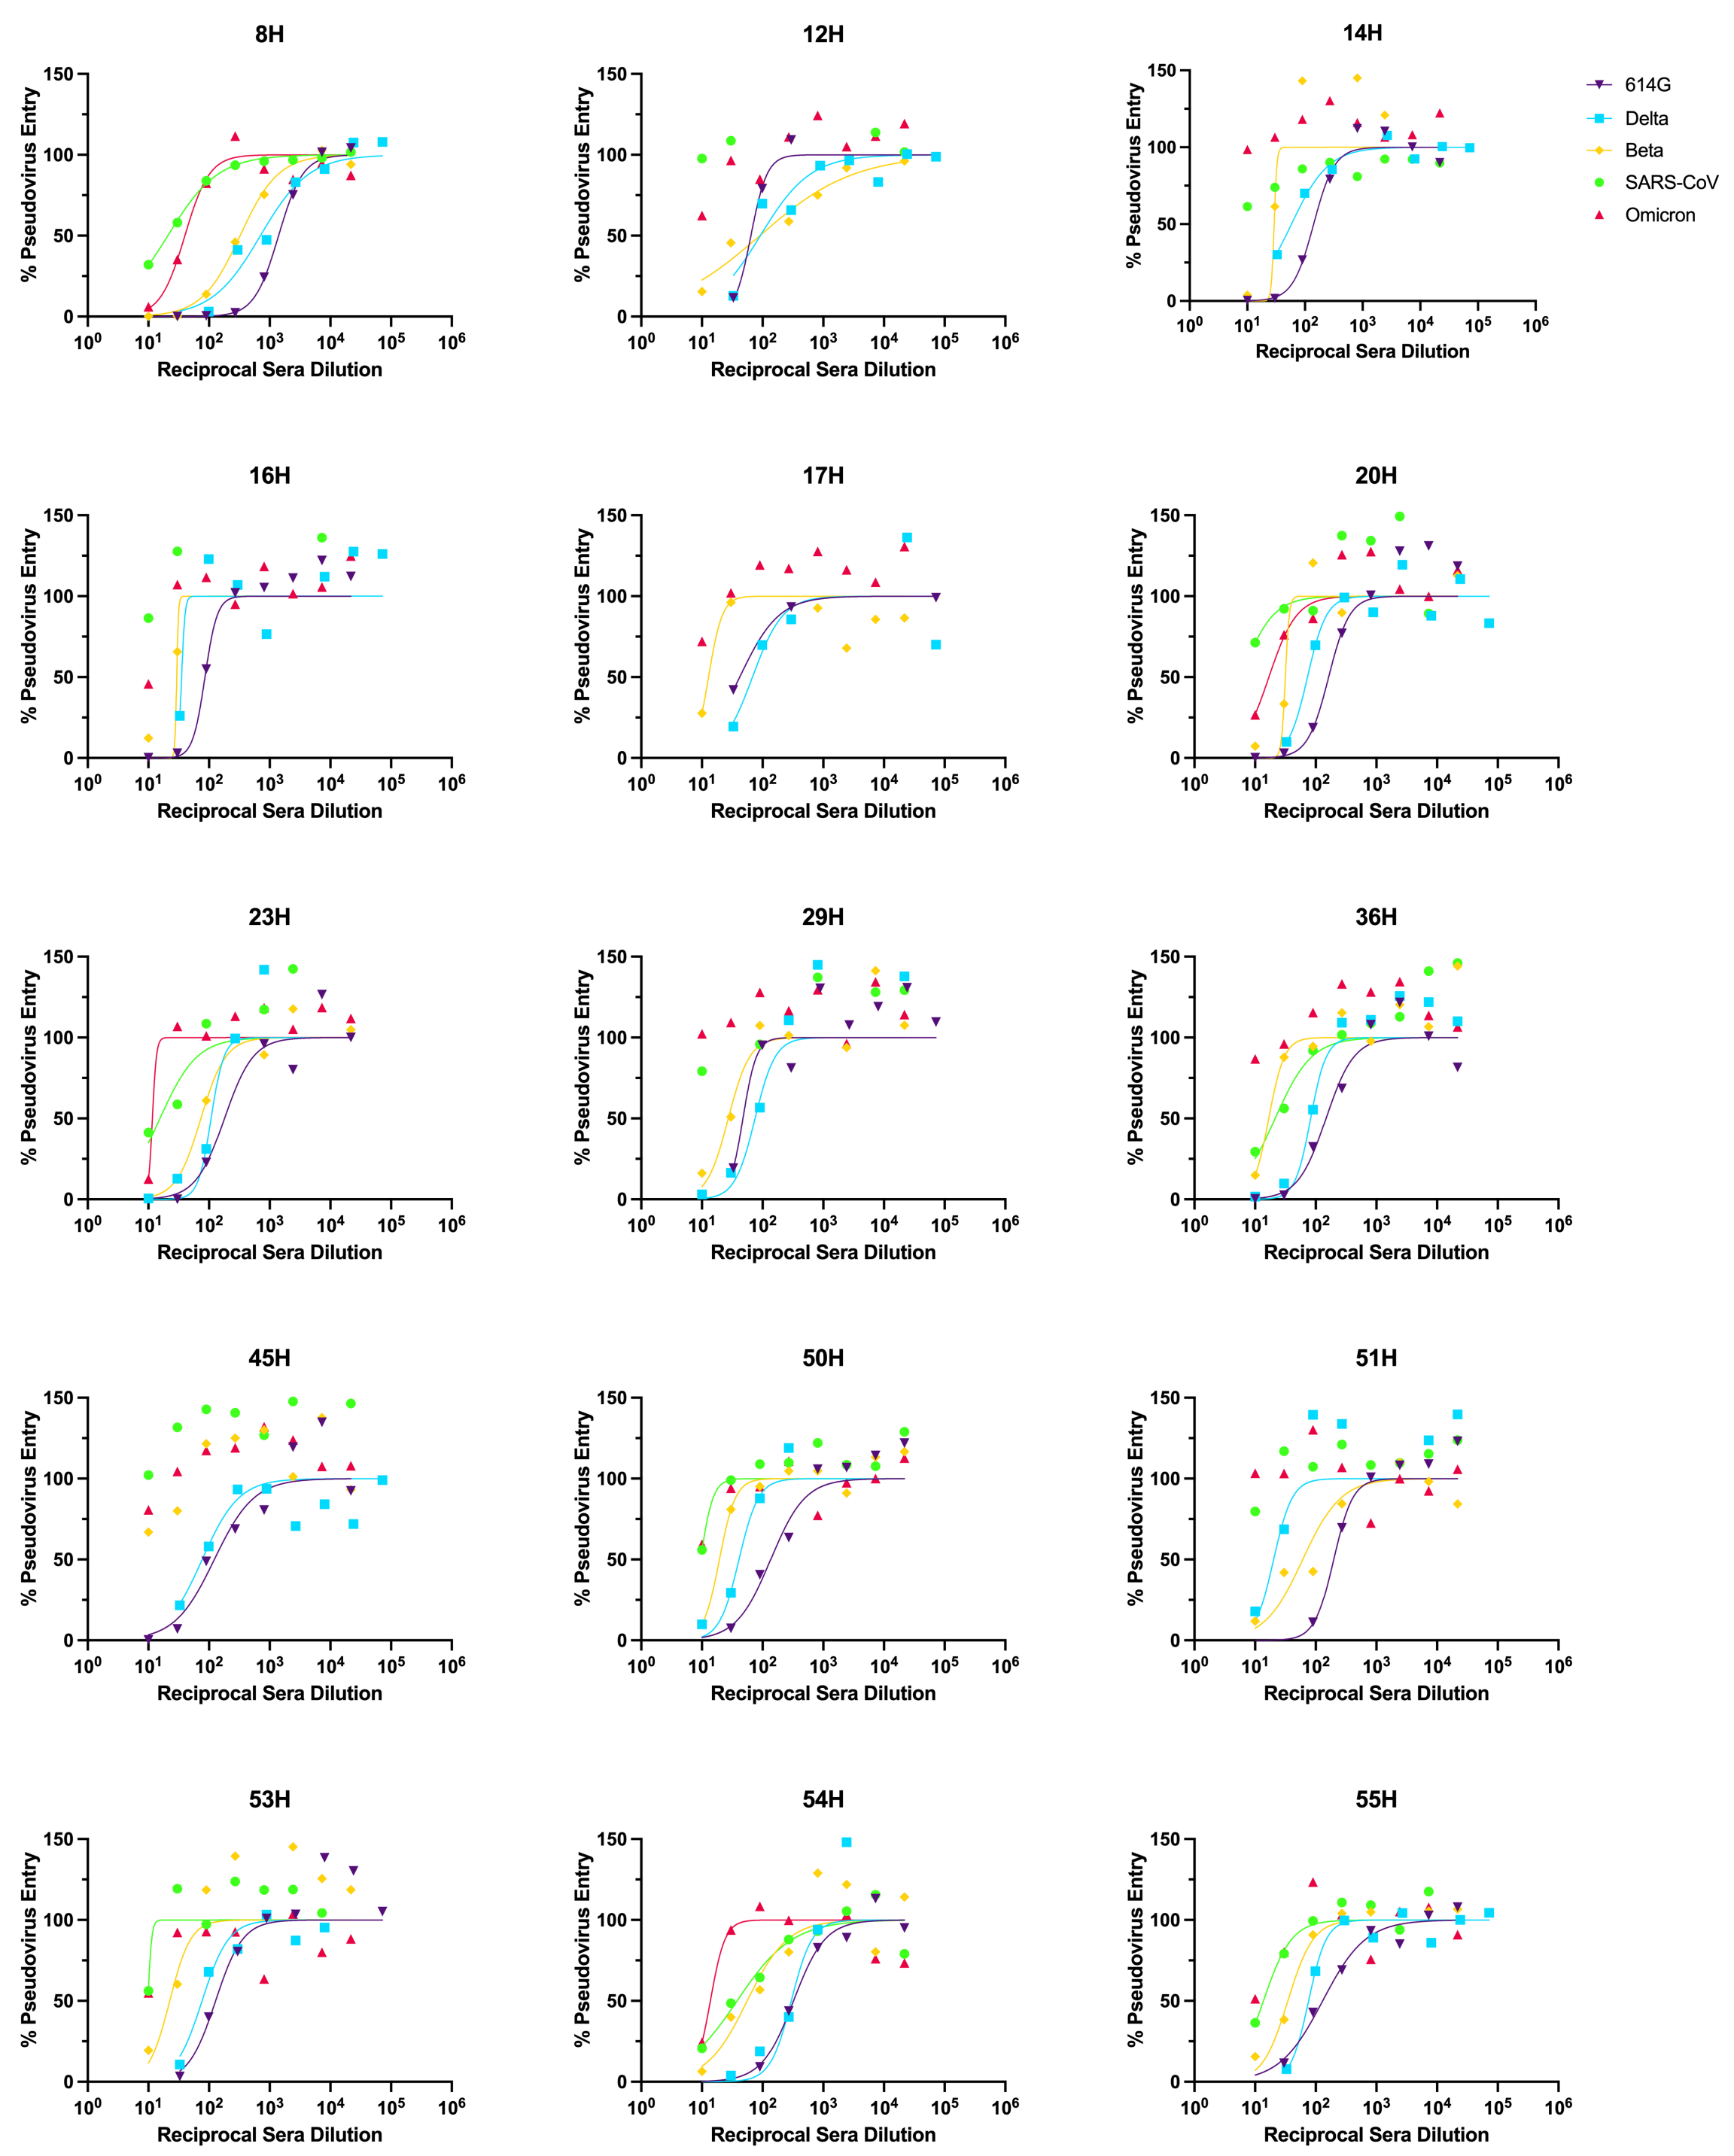

**Normalized neutralization curves using VSV pseudovirus on VeroE6-TMPRSS2 cells for 2X vaccinated-only subjects 180 days post second vaccination.**

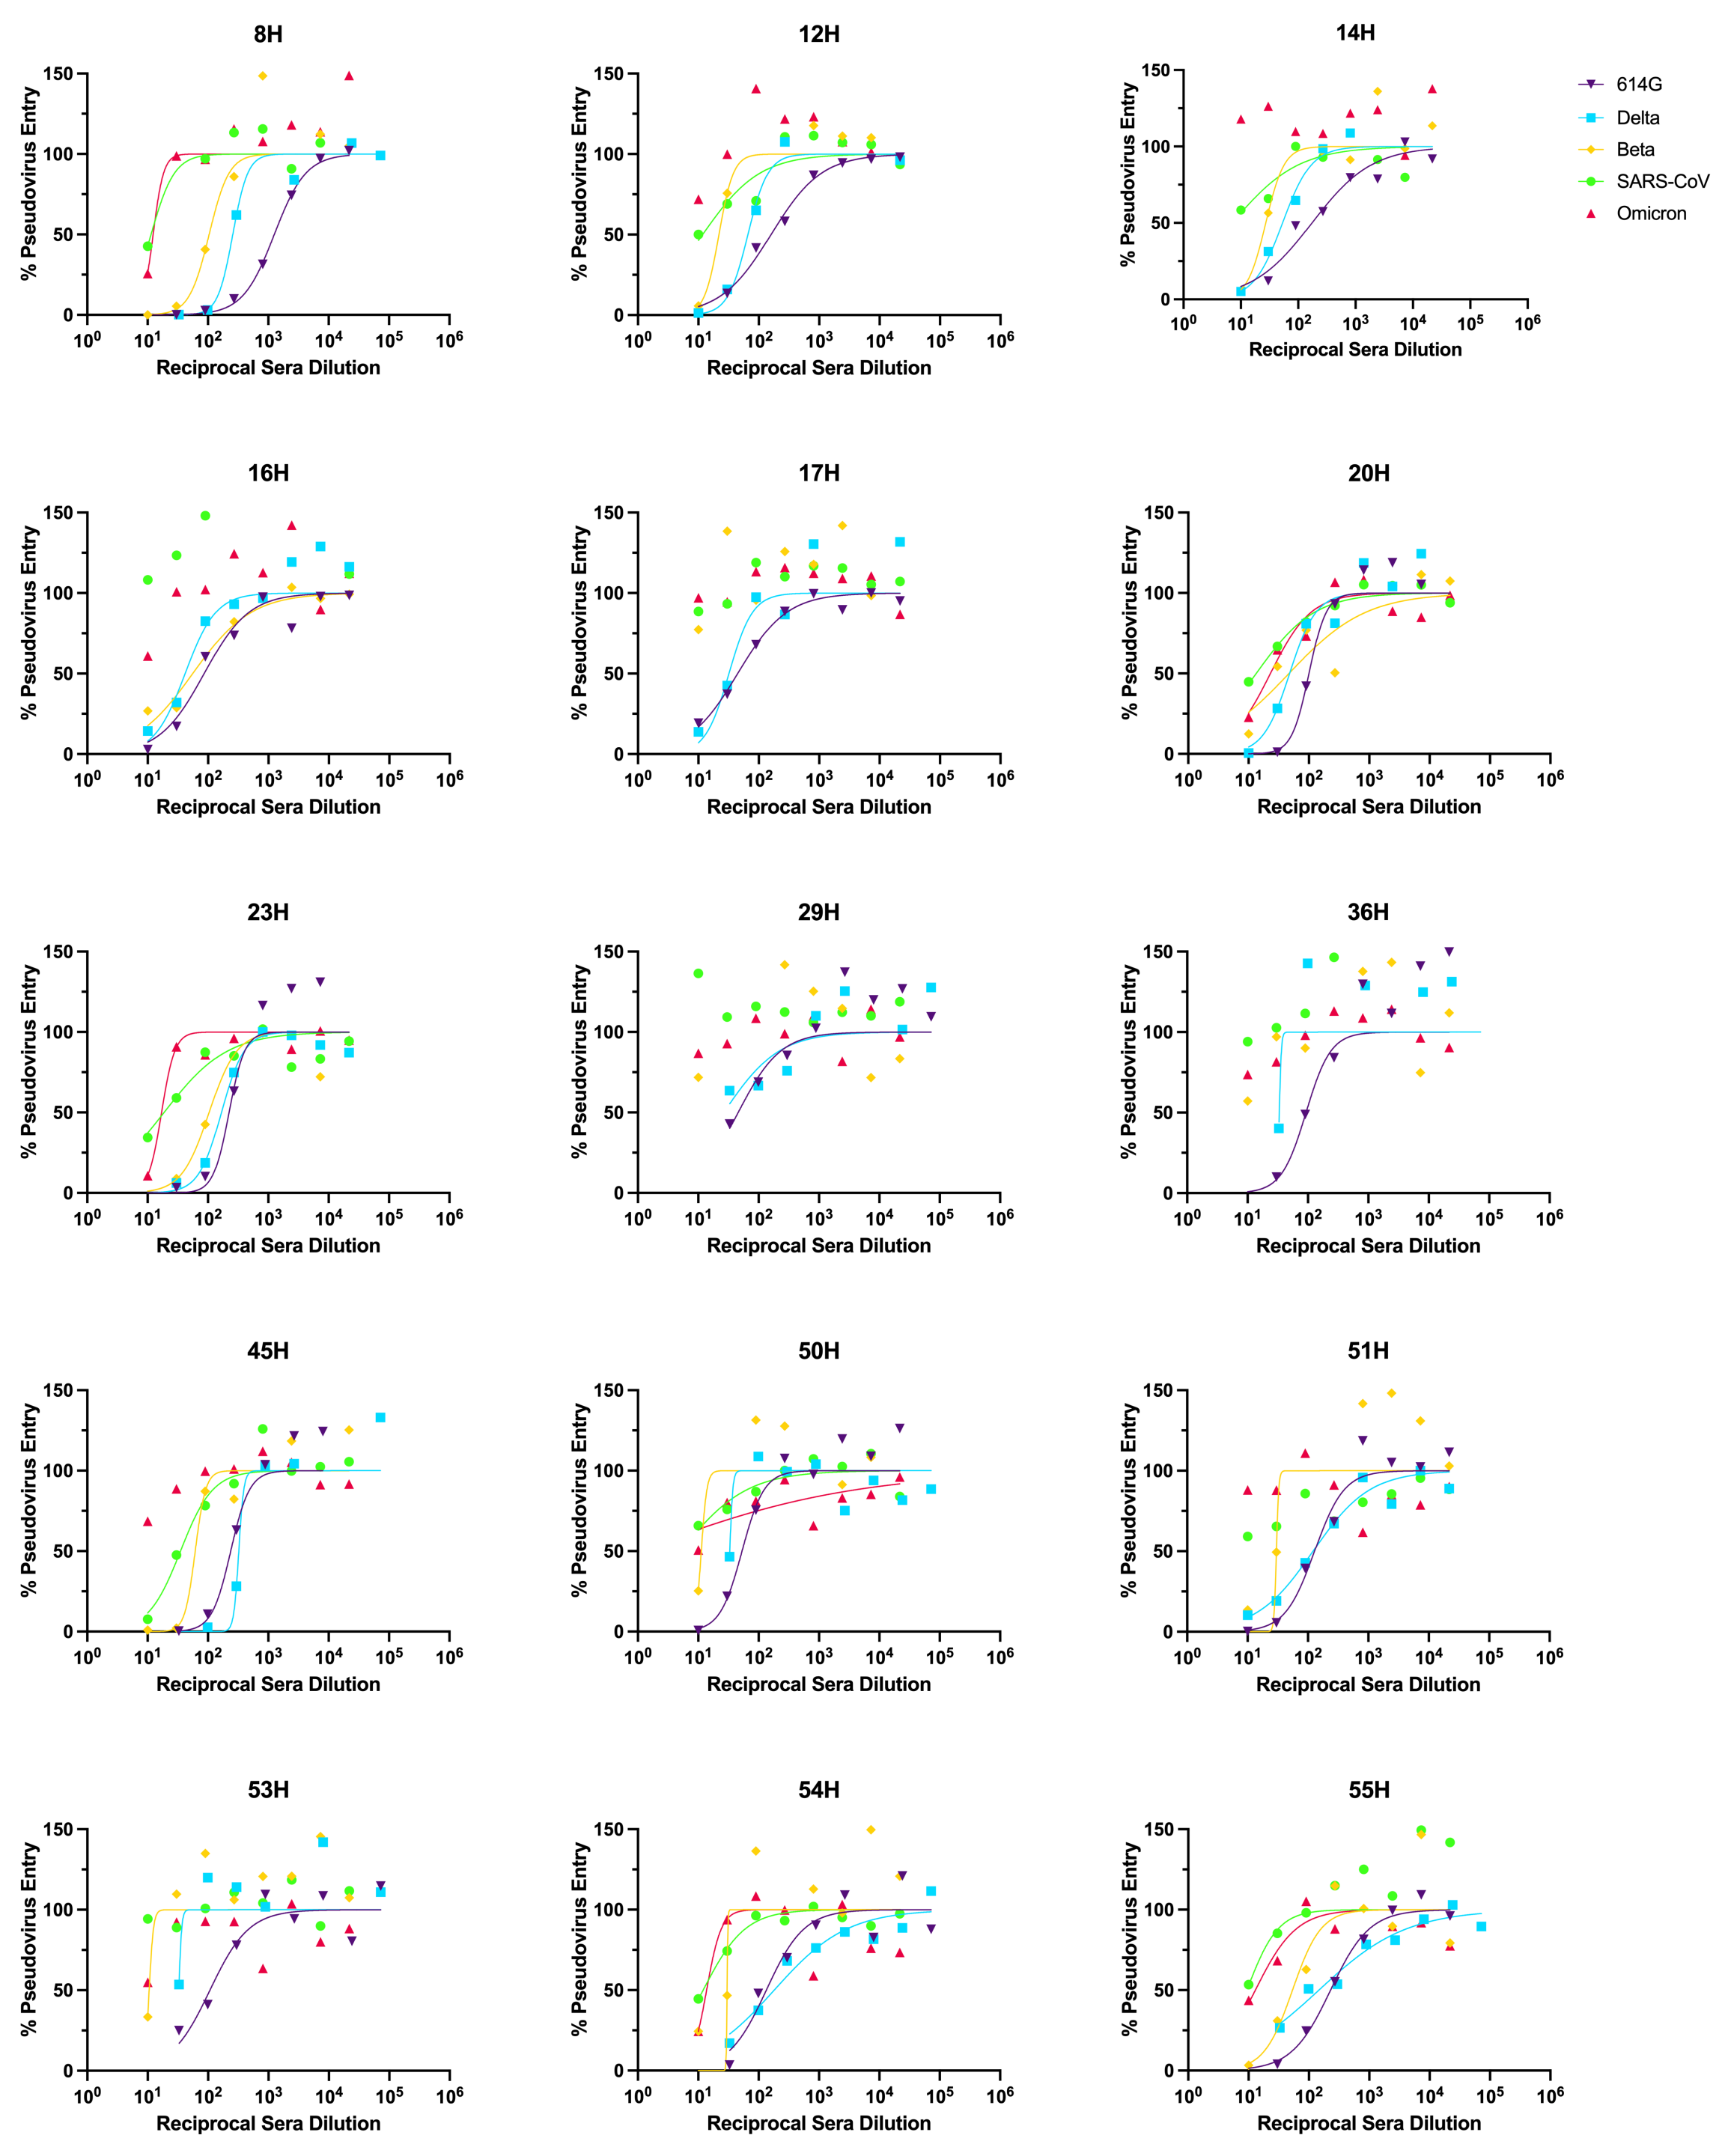

**Normalized neutralization curves using VSV pseudovirus on VeroE6-TMPRSS2 cells for 3X vaccinated-only subjects 10 days post third vaccination.**

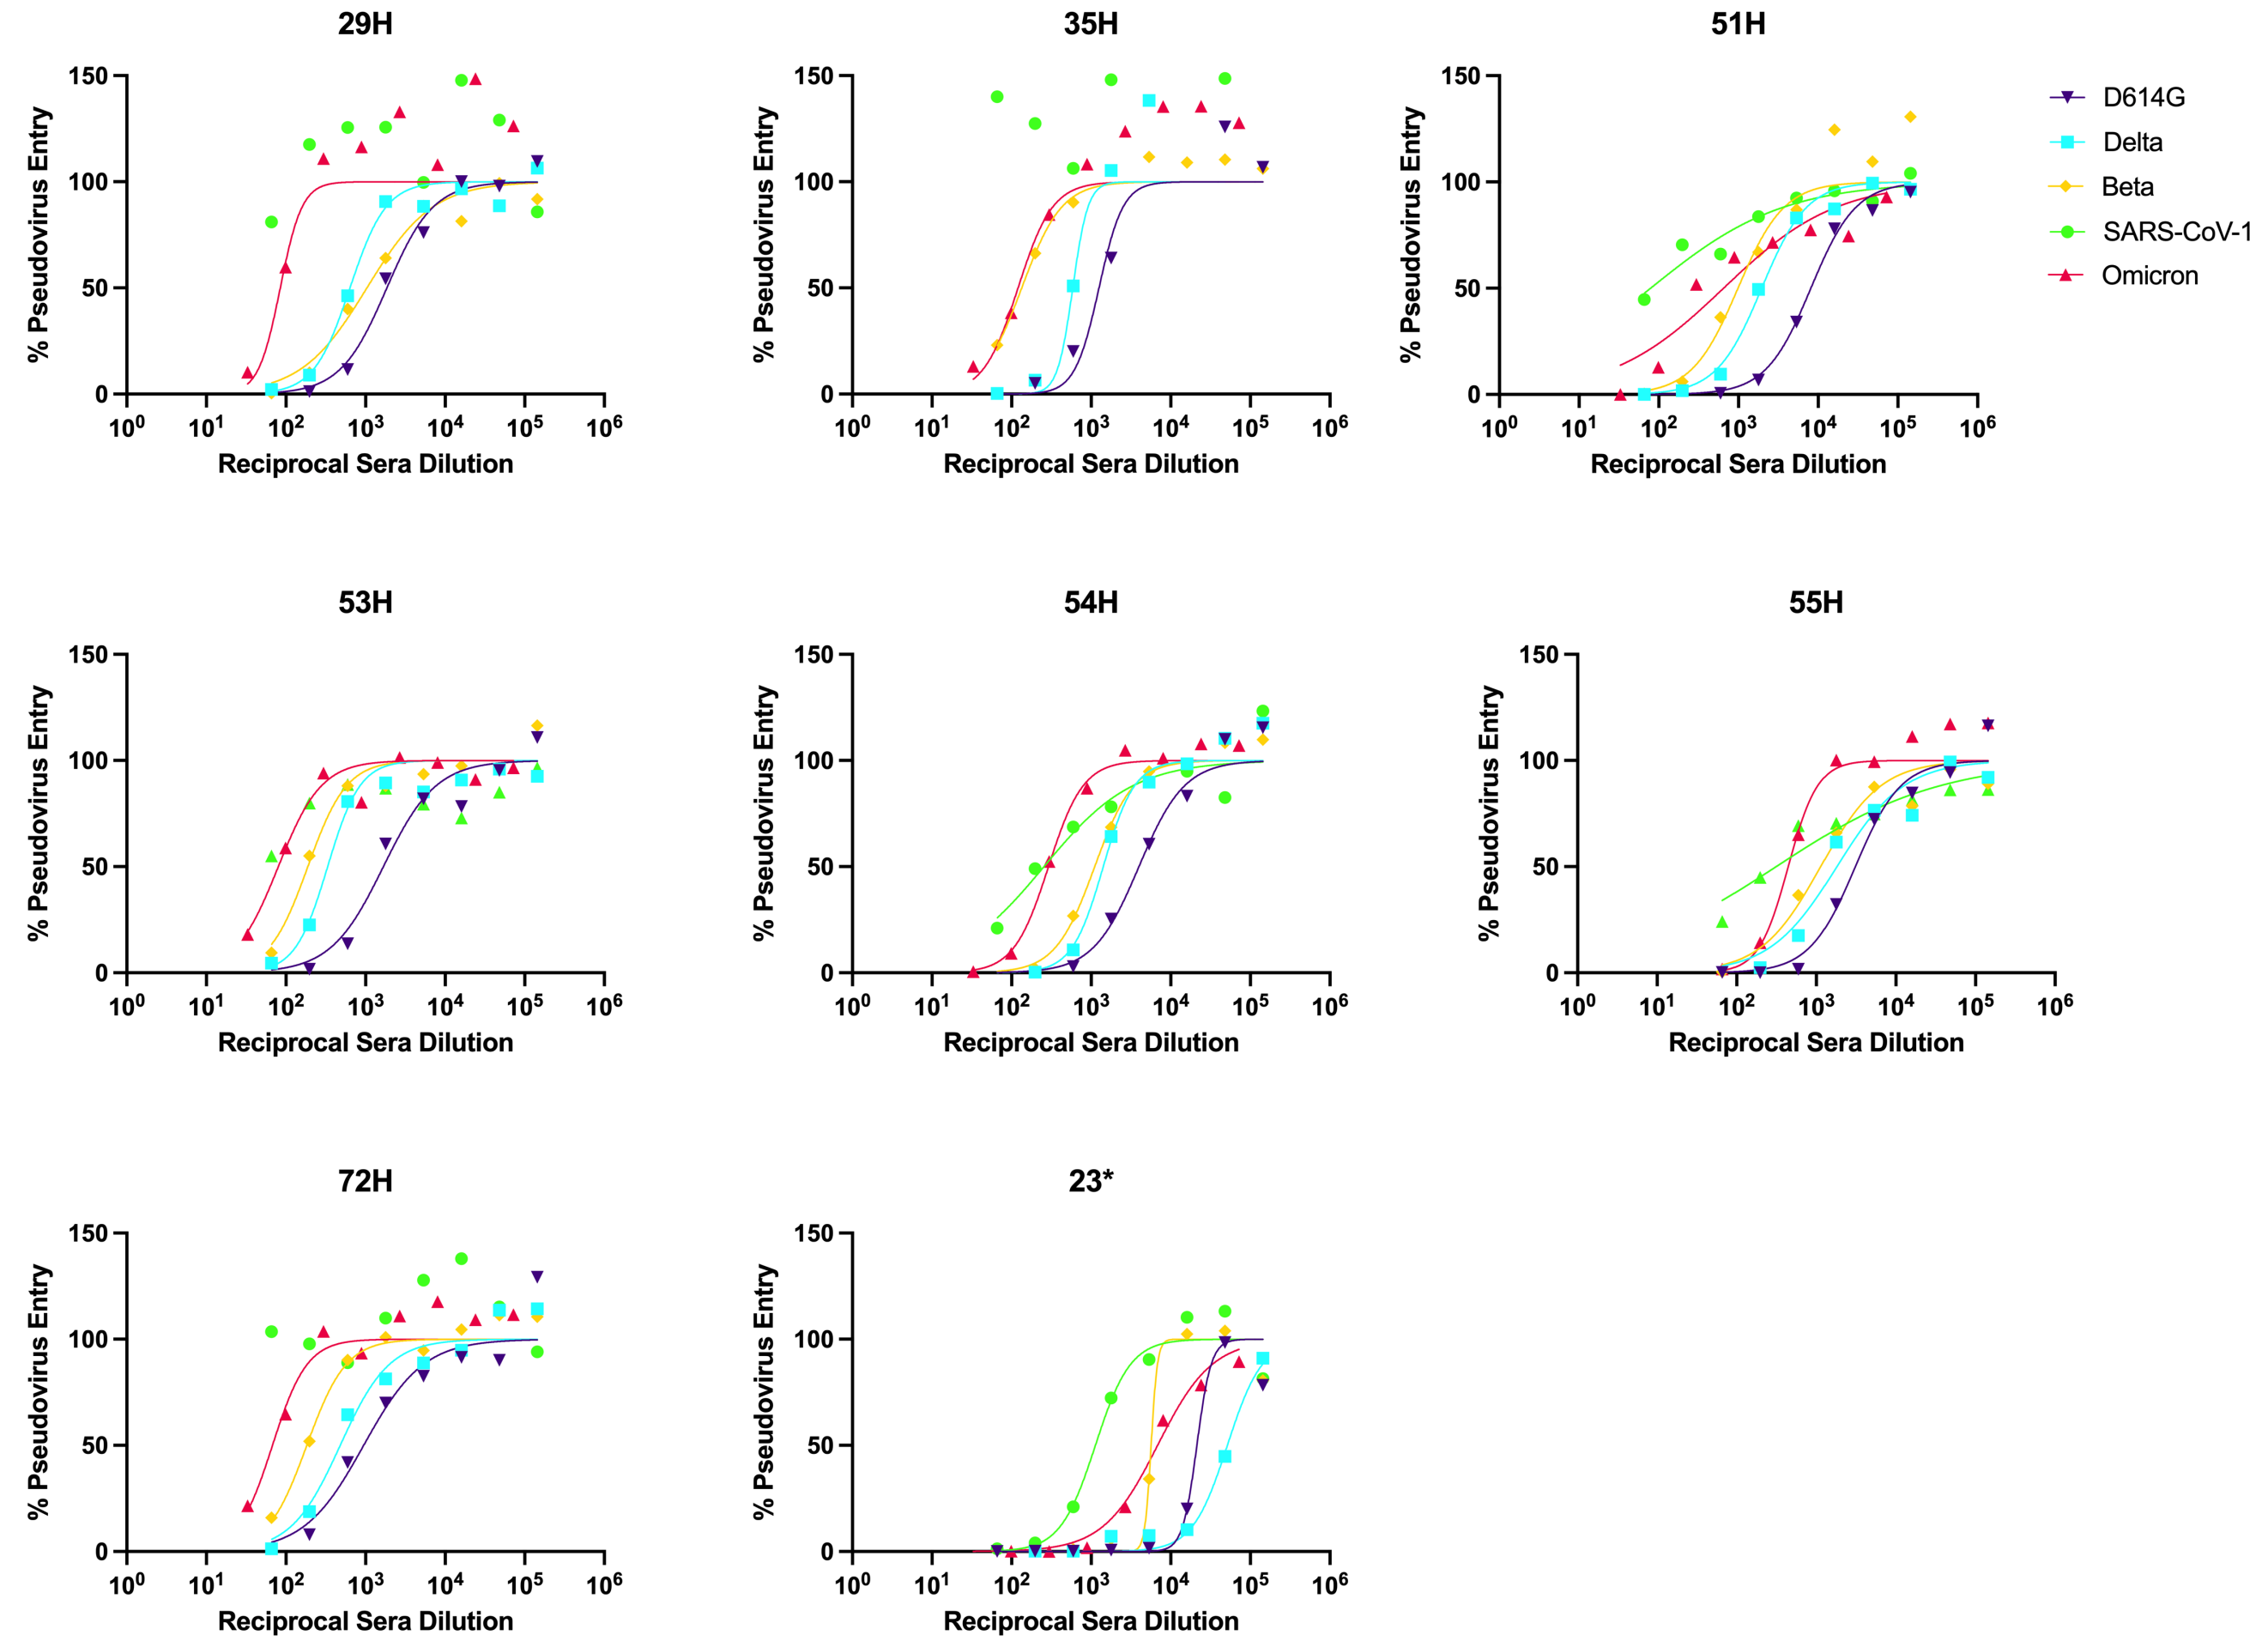

**Normalized neutralization curves using VSV pseudovirus on VeroE6-TMPRSS2 cells for HCP 30 days post vaccination.**

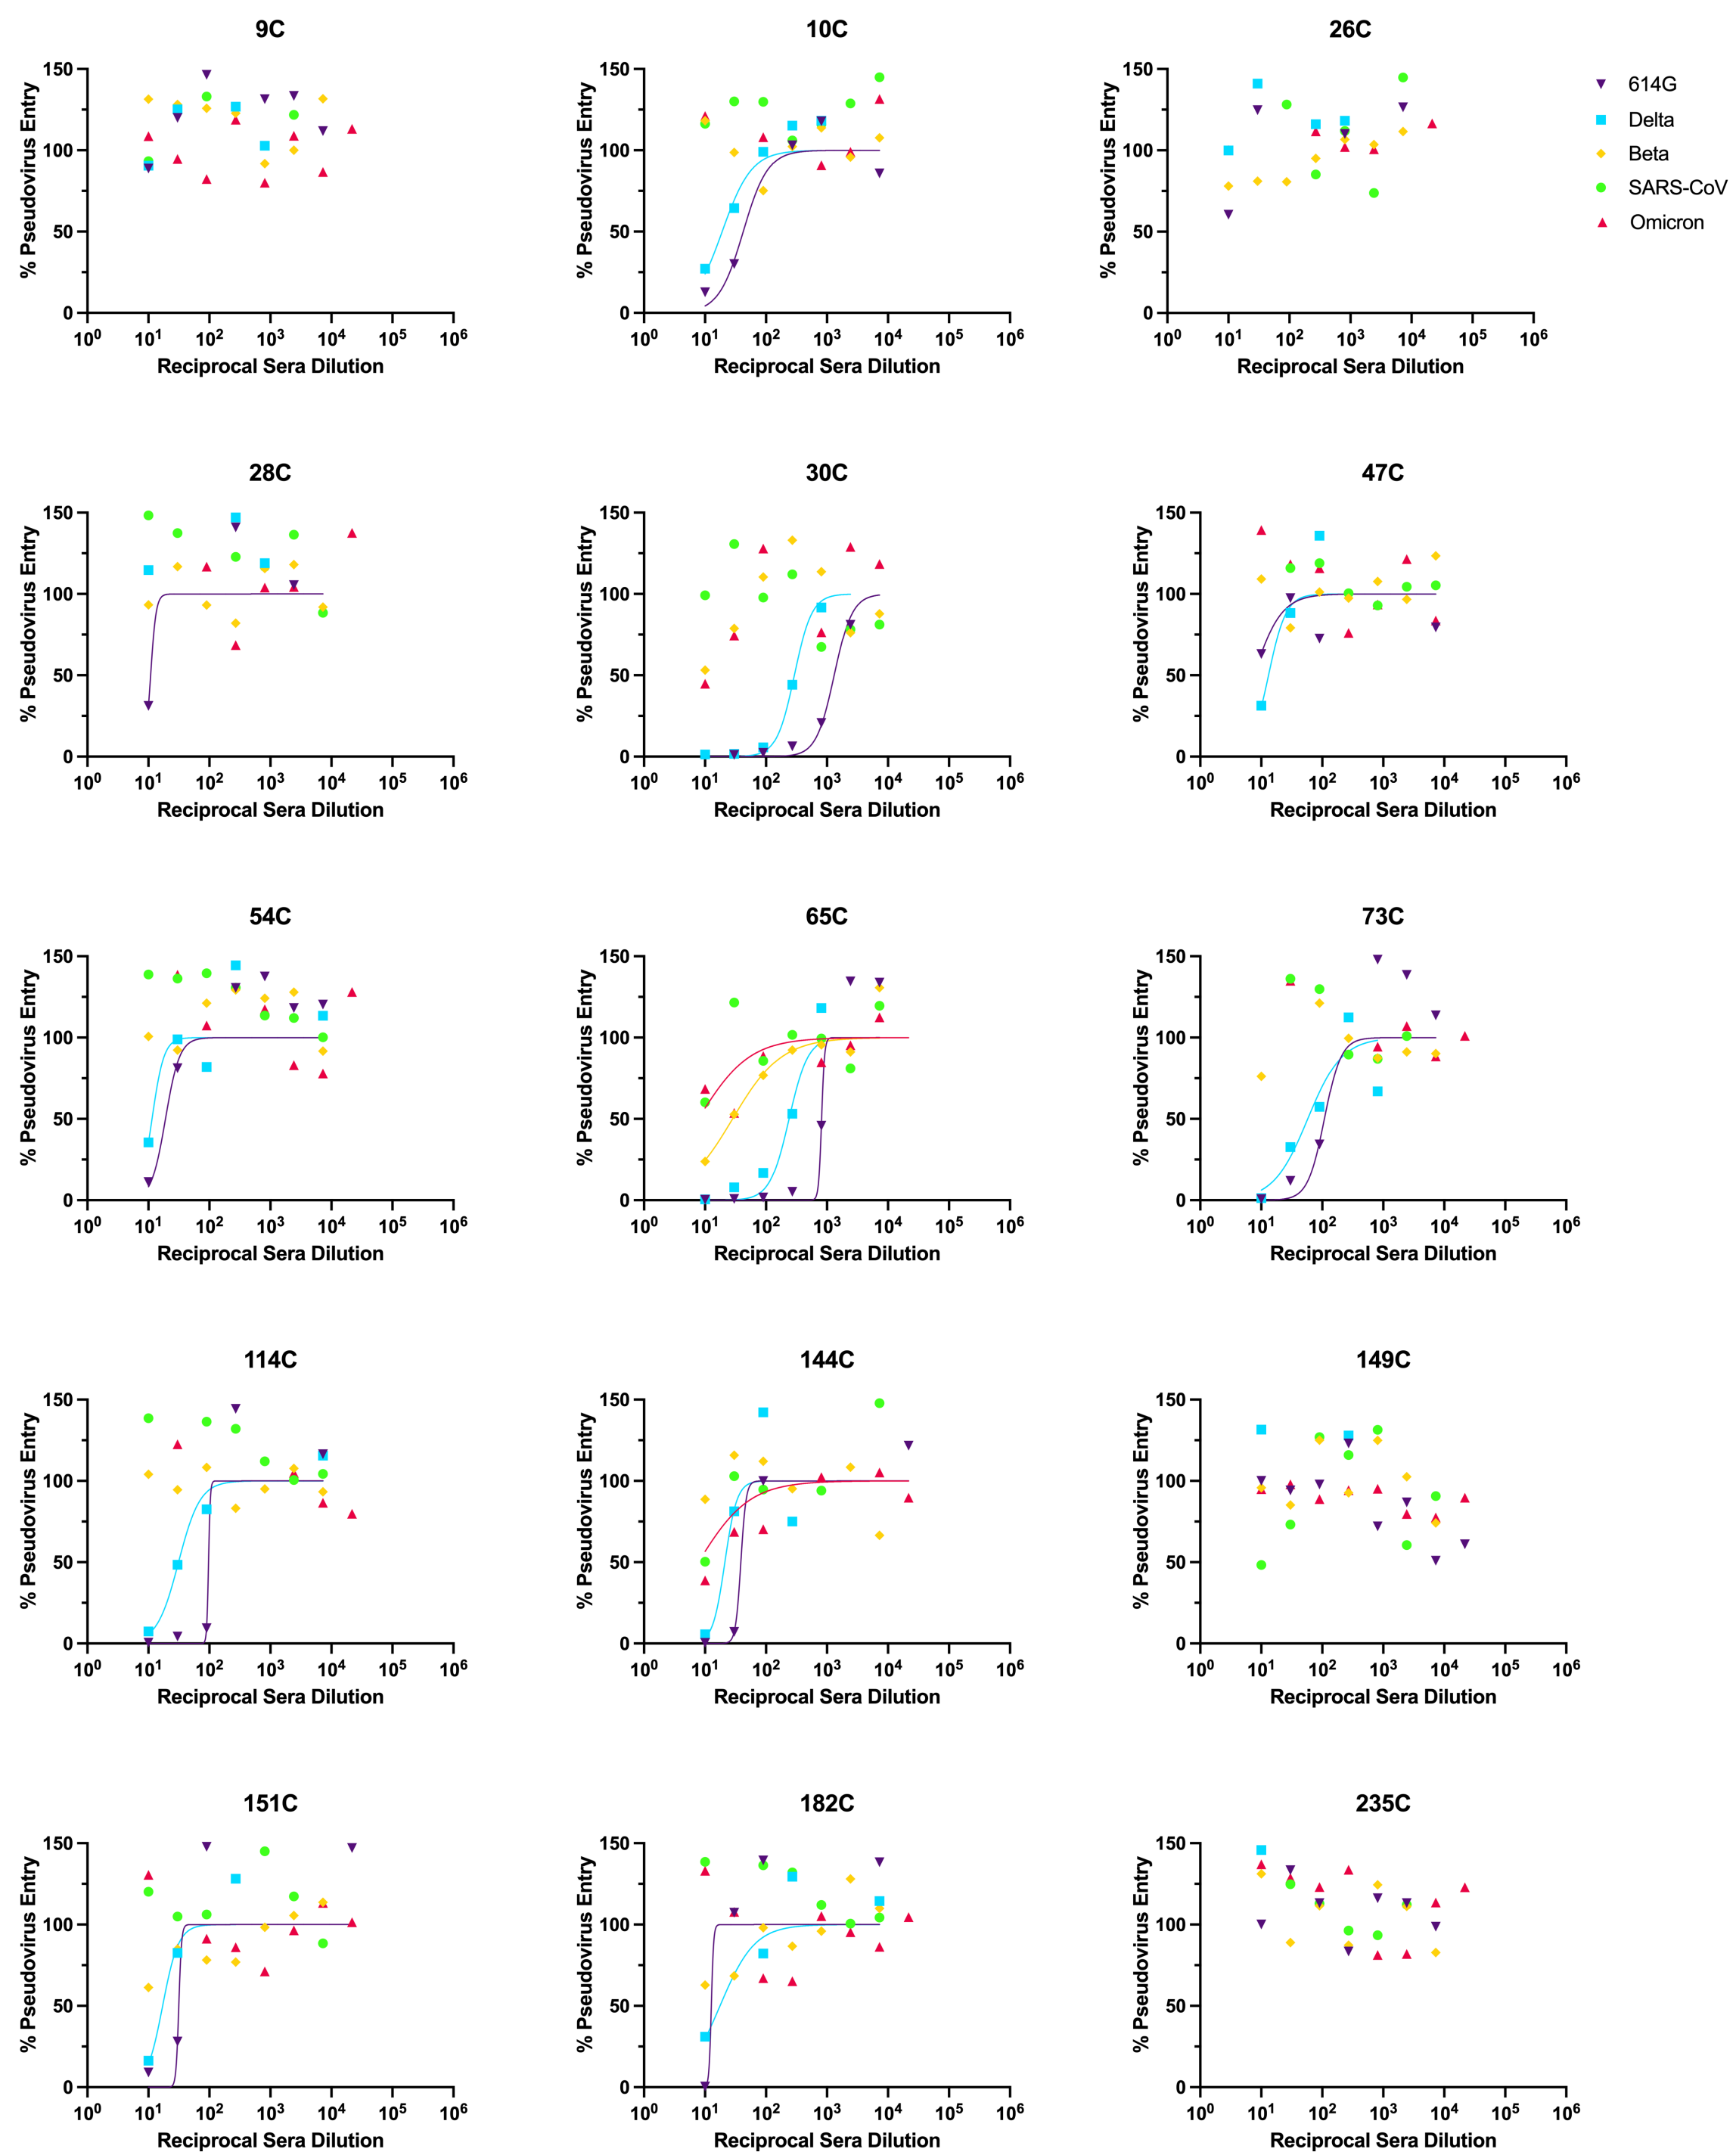

Supplement: mmc3.pdf [file mmc3.pdf]
